1 **Adaptation to seasonal reproduction and thermal minima-related factors**  
2 **drives fine-scale divergence despite gene flow in Atlantic herring populations**

3

4

5 Angela P. Fuentes-Pardo<sup>1</sup>, Christina Bourne<sup>2</sup>, Rabindra Singh<sup>3</sup>, Kim Emond<sup>4</sup>, Lisa Pinkham<sup>5</sup>,  
6 Jenni L. McDermid<sup>6</sup>, Leif Andersson<sup>7,8,9</sup>, Daniel E. Ruzzante<sup>1</sup>

7

8

9 **Affiliations:**

10 <sup>1</sup> Department of Biology, Dalhousie University, Halifax, Nova Scotia, Canada.

11 <sup>2</sup> Fisheries and Oceans Canada, Northwest Atlantic Fisheries Centre, St John's, NL, Canada.

12 <sup>3</sup> Fisheries and Oceans Canada, St. Andrews Biological Station, St. Andrews, NB, Canada.

13 <sup>4</sup> Fisheries and Oceans Canada, Maurice Lamontagne Institute, Mont-Joli, QC, Canada.

14 <sup>5</sup> Department of Marine Resources, West Boothbay Harbor, Maine, USA.

15 <sup>6</sup> Fisheries and Oceans Canada, Gulf Fisheries Centre, Moncton, NB, Canada.

16 <sup>7</sup> Science for Life Laboratory, Department of Medical Biochemistry and Microbiology, Uppsala  
17 University, Uppsala, Sweden.

18 <sup>8</sup> Department of Veterinary Integrative Biosciences, Texas A&M University, College Station,  
19 USA.

20 <sup>9</sup> Department of Animal Breeding and Genetics, Swedish University of Agricultural Sciences,  
21 Uppsala, Sweden

22

23

24 **Corresponding authors:** Angela P. Fuentes-Pardo (apfuentesp@gmail.com) and Daniel E.  
25 Ruzzante (daniel.ruzzante@dal.ca), Dalhousie University, 1355 Oxford Street, B3H 4R2,  
26 Halifax, Canada, +1 (902) 494 1688.

27 **Abstract:**

28 High connectivity and low potential for local adaptation have been common assumptions for  
29 most marine species, given their usual high fecundity and dispersal capabilities. Recent genomic  
30 studies however, have disclosed unprecedented levels of population subdivision in what were  
31 previously presumed to be panmictic or nearly panmictic species. Here we analyzed neutral and  
32 adaptive genetic variation at the whole-genome level in Atlantic herring (*Clupea harengus* L.)  
33 spawning aggregations distributed across the reproductive range of the species in North America.  
34 We uncovered fine-scale population structure at putatively adaptive loci, despite low genetic  
35 differentiation at neutral loci. Our results revealed an intricate pattern of population subdivision  
36 involving two overlapping axes of divergence: a temporal axis determined by seasonal  
37 reproduction, and a spatial axis defined by a latitudinal cline establishing a steep north-south  
38 genetic break. Genetic-environment association analyses indicated that winter sea-surface  
39 temperature is the best predictor of the spatial structure observed. Thousands of outlier SNPs  
40 distributed along specific parts of the genome spanning numerous candidate genes underlined  
41 each pattern of differentiation, forming so-called “genomic regions or islands of divergence”. Our  
42 results indicate that timing of reproduction and latitudinal spawning location are features under  
43 disruptive selection leading to local adaptation in the herring. Our study highlights the  
44 importance of preserving functional and neutral intraspecific diversity, and the utility of an  
45 integrative seascape genomics approach for disentangling intricate patterns of intraspecific  
46 diversity in highly dispersive and abundant marine species.

47

48 **Keywords:** Population genomics, local adaptation, fisheries, management, conservation, pool-  
49 seq, whole genome re-sequencing.

50 **Introduction:**

51 Population subdivision and connectivity are important topics in evolutionary and  
52 conservation biology, because they can help elucidate how local adaptation arises (Barrett &  
53 Hoekstra, 2011; Lewontin, 2002) and can guide management plans aiming to protect intraspecific  
54 genetic diversity, a determinant factor for population persistence in changing environments  
55 (Allendorf, Hohenlohe, & Luikart, 2010). Yet, the scarcity of genomic resources for most  
56 species, and the difficulty in determining the relative importance of genetic drift, gene flow, and  
57 selection in shaping contemporary patterns of intraspecific genetic diversity, remain major  
58 challenges (Ravinet et al., 2017). The increased power for assessing neutral and putatively  
59 adaptive genetic variation with next-generation sequencing (NGS) technologies (Nosil & Feder,  
60 2012) is helping to uncover unprecedented levels of genetic structure in what were previously  
61 presumed to be panmictic or nearly panmictic species.

62  
63 Marine species are outstanding examples of such paradigm shifts, as they have often been  
64 expected and observed to exhibit low levels of population structure and low divergence potential  
65 (Palumbi, 1994), given their high fecundity and dispersal capabilities (Hauser & Carvalho, 2008).  
66 Recent genomic studies revealing fine-scale structuring are challenging this view [e.g., Atlantic  
67 cod (*Gadus morhua*) (Bradbury et al., 2013); Atlantic herring (*Clupea harengus*) (Martinez  
68 Barrio et al., 2016); American lobster (*Homarus americanus*) (Benestan et al., 2015)]. Various  
69 mechanisms by which population structure could arise have been proposed, including:  
70 oceanographic barriers, isolation-by-distance, larval and adult behavior, recent evolutionary  
71 history (e.g. historical vicariance and secondary contact), and natural selection (Palumbi, 1994).  
72 There is great interest in understanding how natural selection can lead to population divergence

73 and local adaptation, especially under the homogenizing effect of gene flow (Tigano & Friesen,  
74 2016) because of its direct relationship with fitness, population persistence, and evolution.  
75 However, the genetic basis of adaptive traits remains largely unknown (Barrett & Hoekstra,  
76 2011). Genome scans performed with NGS methods are helping to identifying loci associated  
77 with adaptive phenotypes (Jones et al., 2012; Tavares et al., 2018). Such loci typically show  
78 elevated genetic divergence that is interpreted as a signature of selection. Nevertheless,  
79 disentangling genomic signatures of selection from signatures of demographic history has been  
80 limiting (Hoban et al., 2016). Species that are widely distributed are often exposed to diverse  
81 ecological habitats where selection can result in local adaptation (Yeaman & Whitlock, 2011).  
82 Therefore, highly fecund marine species inhabiting heterogeneous environments offer ideal  
83 candidates for the study of ecological adaptation, since in these the effect of genetic drift is  
84 minuscule and the effectiveness of natural selection is greater.

85  
86 Atlantic herring is an abundant marine schooling pelagic fish that has colonized diverse  
87 environments throughout the North Atlantic, including open ocean and the brackish waters of the  
88 Baltic Sea. These characteristics, together with the increasing availability of genomic resources,  
89 make this species ideal for investigating the genetic basis and mechanisms involved in ecological  
90 adaptation. Juveniles and adults undertake annual migrations between feeding, overwintering,  
91 and spawning areas. Herring matures at 3-4 years of age and can live to 20+ years (Benoît et al.,  
92 2018). Spawning occurs mostly in spring and fall seasons at predictable times and locations near  
93 shore, which suggests strong spawning site fidelity (McQuinn, 1997; Stephenson, Melvin, &  
94 Power, 2009; Wheeler & Winters, 1984). Atlantic herring plays an important role in the marine  
95 ecosystem, feeding on plankton and being preyed upon by numerous marine fish, birds and

96 mammals. It also sustains large fisheries throughout the North Atlantic (FAO, 2019), some of  
97 which have experienced severe periods of decline and signs of recovery in the last century  
98 (Britten, Dowd, & Worm, 2016; Engelhard & Heino, 2004; Overholtz, 2002; Simmonds, 2007).  
99 The ecological, economic, and cultural importance of herring has therefore motivated research on  
100 this species for more than a century (Stephenson et al., 2009); however, its complex life history  
101 has made the description of its population structure elusive (Iles & Sinclair, 1982).

102  
103 Numerous studies have examined the population structure of herring using different  
104 genetic tools and at various spatial scales, mostly in the northeast (NE) Atlantic. Such studies  
105 have observed low levels of population differentiation at neutral loci (Andersson, Ryman,  
106 Rosenberg, & Ståhl, 1981; André et al., 2011; Jorgensen, Hansen, Bekkevold, Ruzzante, &  
107 Loeschcke, 2005). The expansion of these studies to the use of thousands of single nucleotide  
108 polymorphisms (SNPs) derived from various genomic techniques have revealed significant  
109 genetic differentiation at putatively adaptive loci in relation to environmental gradients (Guo, Li,  
110 & Merilä, 2016; Lamichhaney et al., 2012; Limborg et al., 2012). Moreover, the recent  
111 development of a high-quality genome assembly for the Atlantic herring allowed the  
112 identification of many millions of SNPs and a breakthrough in the possibility to study the genetic  
113 basis of ecological adaptation in this species (Martinez Barrio et al., 2016). A few studies have  
114 addressed this question in the northwest (NW) Atlantic (Kerr, Fuentes-Pardo, Kho, McDermid,  
115 & Ruzzante, 2018; Lamichhaney et al., 2017; McPherson, O'Reilly, & Taggart, 2004); while  
116 they provided important insight on population structuring with seasonal reproduction and within  
117 the southern region, and reported temporal stability of genomic divergence between spring and  
118 fall spawners, they were limited by scarce sampling.

119  
120           In the NW Atlantic, herring spawn from Cape Cod to southern Labrador (Bourne,  
121 Mowbray, Squires, & Koen-Alonso, 2018; Sinclair & Iles, 1989) between April and November,  
122 but spawning peaks in spring and fall. Spring- and fall-spawners are therefore the main spawning  
123 types recognized in the region. The relative abundance of each reproductive strategy varies  
124 geographically: in the north (northern Newfoundland) spring-spawners were historically more  
125 abundant, at mid-range (Gulf of St. Lawrence) both strategies were common, and in the southern  
126 extreme (Bay of Fundy, Scotian Shelf, Gulf of Maine) fall-spawners predominate (Melvin,  
127 Stephenson, & Power, 2009). Changes in the prevalence of these components have been observed  
128 in the last decade; in particular, a significant decline of spring-spawners and a moderate  
129 abundance of fall-spawners in the Gulf of St. Lawrence (McDermid, Swain, Turcotte, Robichaud,  
130 & Surette, 2018) and Newfoundland (Bourne et al., 2018). Such changes have been attributed to  
131 varying elevated fishing mortality, declines in weight-at-age, and environmental conditions  
132 (Melvin et al., 2009), suggesting that the effects of climate change on population persistence of  
133 Atlantic herring are important. The concerning population declines (Britten et al., 2016)  
134 emphasize the need to disentangle the population structure of NW Atlantic herring.

135  
136           Here, we study neutral and adaptive variation of adult herring collected from 14 spawning  
137 grounds distributed across the species' reproductive range in the NW Atlantic. The two  
138 overarching questions were: *i*) What are the spatial scale and pattern of population structuring in  
139 herring and what is the genetic basis of such structuring, and *ii*) What is the potential functional  
140 effect of variant sites underlying population divergence and which mechanisms and  
141 environmental variables are associated with population structure patterns? We used whole-

142 genome re-sequencing of pools of individuals [Pool-seq, (Schlötterer, Tobler, Kofler, & Nolte,  
143 2014)] and individual genotyping along with multivariate statistical approaches, machine  
144 learning algorithms, and oceanographic information, to address these questions. Considering the  
145 particular attributes of the NW Atlantic Ocean (DFO, 1997; Townsend, Thomas, Mayer, Thomas,  
146 & Quinlan, 2004) and the importance of environment for shaping population divergence in  
147 herring, we predict that some of the divergent genomic regions exclusively found in Canada may  
148 be strongly associated with local environmental conditions. Our results provide insight into how  
149 population divergence arises in the presence of gene flow via temporal and spatial isolation and  
150 will help inform management and conservation practices.

151

152

## 153 **Materials and Methods:**

### 154 ***Sample collection and DNA extraction***

155 Adult herring (N=697) were collected from 14 inshore spawning aggregations distributed  
156 across Atlantic Canada and the Gulf of Maine (Fig. 1A and Table 1). Collections took place  
157 during the local spawning peak in the spring and fall seasons from 2012 to 2016. Sampling  
158 locations correspond to areas with recurrent annual spawning and jointly represent most of the  
159 reproductive range of the species in the NW Atlantic. Because of the presumed spawning site  
160 fidelity and the mixing of populations during the non-spawning seasons, we targeted individuals  
161 in reproductive condition to assess population definition. Individual muscle or fin tissue samples  
162 were preserved in 95% ethanol at -20 °C until processing. DNA was isolated from the tissue  
163 samples using a standard phenol chloroform protocol. DNA concentration (in ng/μl) was  
164 measured in triplicates using the Quant-iT PicoGreen dsDNA assay (Thermo Fisher Scientific,

165 U.S.) and the Roche LightCycler 480 Instrument (Roche Molecular Systems, Inc., Germany).  
166 DNA integrity was verified with 0.8% agarose gel electrophoresis using 0.5x TBE buffer and a  
167 1Kbp molecular weight ladder.

168

### 169 *Pool-sequencing and read quality filtering*

170 Genome-wide patterns of genetic variation and population allele frequencies were  
171 assessed for each spawning aggregation using the Pool-seq approach. This method consists of  
172 performing whole-genome sequencing of pools of individuals using a single barcoded library,  
173 which implies that only population level data is recovered (individual genotype information is  
174 lost). In our case, each pool comprised equal amounts of DNA of ~50 individuals collected on the  
175 same spawning ground (the terms spawning aggregation and sampling site will be  
176 interchangeably used hereafter). Individual DNA were normalized to a common concentration  
177 and pooled to a single tube using the liquid handling robot epmotion 5407 (Eppendorf,  
178 Germany). Sequencing library preparation and shotgun sequencing were outsourced. In brief, a  
179 single TruSeq Nano Illumina DNA library was built for each DNA pool (i.e. spawning  
180 aggregation). AMPURE beads were used for fragment size selection, targeting an insert size of  
181 ~550 bp. The 14 pooled-DNA libraries were sequenced using paired-end 126-bp reads on an  
182 Illumina Hiseq-2500 sequencer in two batches (5 libraries in 2015, 11 in 2016). Target read depth  
183 of coverage per pool was 40-50x, for an estimated herring genome size of ~850 Mbp (Martinez  
184 Barrio et al., 2016).

185 Quality of raw sequence reads of each pool was checked using FastQC v0.11.5 (Andrews,  
186 2010), and jointly evaluated for the 14 pools with MultiQC v.1.3 (Ewels, Magnusson, Lundin, &  
187 Käller, 2016). Low quality bases (Phred score <20) and Illumina adapters were trimmed-off the



188 reads, and reads shorter than 40 bp were removed from the dataset using Trimmomatic v.0.36  
189 (Bolger, Lohse, & Usadel, 2014) [*parameters: ILLUMINACLIP:TruSeq3-PE-2.fa:2:30:10*  
190 *SLIDINGWINDOW:5:20 MINLEN:40*]. High quality paired-reads remaining after filtering were  
191 used for downstream analysis.

192

### 193 ***Read mapping, SNP calling and filtering***

194 We adapted the Genome Analysis Toolkit (GATK) Best Practices workflow (Van der  
195 Auwera et al., 2013) to variant discovery in Pool-seq data and to our computing infrastructure.  
196 For this we first obtained a stitched version of the herring genome for optimal SNP caller  
197 performance in the computer cluster available. Then, sequence reads of each pool were  
198 independently aligned against the stitched herring genome using the Burrows-Wheeler Aligner  
199 (BWA) v0.7.12-r1039 [*default parameters, MEM algorithm*] (Li, 2013). SNP calling was  
200 performed using GATK v3.8 (McKenna et al., 2010) (see Fig. S1). Lastly, the raw variant calls  
201 were filtered using GATK (Fig. S2), Popoolation2, and custom python scripts (See Supporting  
202 Information for details). In Pool-seq applications, population allele frequencies are derived from  
203 the total read counts supporting a variant site. Read coverage though, can be biased by  
204 sequencing and read mapping artifacts (Dohm, Lottaz, Borodina, & Himmelbauer, 2008;  
205 Kolaczkowski, Kern, Holloway, & Begun, 2011). To control for these factors and minimize their  
206 potential effect on population allele frequency calculation, we applied the allele count correction  
207 proposed by (Feder, Petrov, & Bergland, 2012; Kolaczkowski et al., 2011). Details on the  
208 application of this correction method and population allele frequencies estimation can be found in  
209 the Supporting Information.

210

211 ***Population structure***

212           Based on the population allele frequencies, we examined genetic structure among  
213 spawning aggregations with a Neighbor-Joining (NJ) phylogenetic tree and with pairwise  $F_{ST}$   
214 estimates. We computed pairwise Nei (1972) genetic distance with *Gendist* and built a NJ tree  
215 with *Neighbor*, both programs implemented in the package PHYLIP v3.697 (Baum, 1989).  
216 Bootstrapping was performed using the program *Seqboot* of PHYLIP, and the consensus tree was  
217 visualized with FigTree (Rambaut, 2007). We estimated unbiased  $F_{ST}$  for pools ( $\hat{F}_{ST}^{pool}$ ) between  
218 all pairs of spawning aggregations using the R package *poolfstat* (Hivert, 2018). This algorithm  
219 computes  $F$ -statistics equivalent to Weir & Cockerham (1984) estimates, while accounting for  
220 random sampling of chromosomes that may occur during DNA pooling and sequencing in Pool-  
221 seq applications.

222

223 ***Outlier loci detection and genome-wide patterns of differentiation***

224           To identify loci potentially under selection, we performed genome scans for outlier loci  
225 detection using Principal Component Analysis (PCA), as implemented in the R package *pcadapt*  
226 v.4.0.2 (Luu, Bazin, & Blum, 2017). This algorithm assumes that divergent loci highly correlated  
227 to population structure are likely under selection. Outlier loci are detected based on the  
228 Mahalanobis distance calculated from the correlation coefficients between SNPs and a selected  
229 number of  $K$  principal components (PCs) (i.e. PCA loadings).

230           We performed a genome scan for the first 13 PCs (default is  $K$ =number of pools-1, 14-1= 13)  
231 using a minor allele frequency (MAF) of 0.05. Loci with Benjamini-Hochberg (BH) adjusted  $P$ -  
232 values  $\leq 0.01$  were considered candidates for being under selection. To identify which PCs

233 explained the greatest proportion of genomic variance, we examined the scree plot generated by  
234 *pcadapt*, as well as the allele frequency patterns revealed in heatmaps made with the R package  
235 *ComplexHeatmap* (Gu, Eils, & Schlesner, 2016). The heatmaps depicted population allele  
236 frequencies (standardized to the major allele) of the 200 outlier loci most correlated to each PC  
237 (ranked by *P*-value in ascending order). We further explored the loci driving genomic  
238 differentiation in the herring by performing, with *pcadapt*, component-wise genome scans for the  
239 PCs exhibiting distinctive allele frequency patterns. To examine the distribution of outlier loci  
240 across the herring genome, for each informative PC we obtained Manhattan plots depicting the  
241 genomic position of outlier SNPs and their respective significance association value ( $-\log_{10}P$ -  
242 value) using the R package *qqman* (S. D. Turner, 2014).

243

#### 244 ***Identification of the most informative outlier loci***

245 We ranked outlier loci based on their importance for classification to each of the  
246 categories (or classes) of distinctive genomic patterns of differentiation in herring. For this we  
247 used random forest (RF), a supervised learning algorithm implemented in the R package  
248 *randomForest* (Liaw & Wiener, 2002). For the seasonal reproductive pattern, classes  
249 corresponded to spring or fall. For the latitudinal pattern, classes were northern (SIL-S, SPH-S,  
250 NTS-S, LAB-F, BLS-F, NDB-S, NDB-F, TRB-F, MIR-F, BDO-S, SCB-F), intermediate (MUS-  
251 F, GEB-F), and southern (ME4-F) regions. The RF model was based on 50 individual genotypes  
252 per spawning aggregation simulated from population allele frequencies using the R function  
253 *sample.geno* implemented in *pcadapt* v3.0.4. For the RF runs, the parameter *mtry* was set to  
254 default (equals to  $\sqrt{p}$ , where *p* is the number of loci); *ntree* was set to 1,000,000; and  
255 *sampsiz*e was set to 2/3 of the class with the lower sample size. From a scatter-plot of importance

256 values generated by the random forest classifier (Mean Decrease in Accuracy, MDA), loci before  
257 the point where the differences between importance values level-off (“elbow method”) were  
258 considered the most important (Goldstein, Hubbard, Cutler, & Barcellos, 2010).

259

260 ***Validation of a subset of outlier SNPs related to seasonal reproduction and to latitudinal***  
261 ***divergence***

262 We validated some of the top candidate loci detected with Pool-seq data that showed  
263 strong association with seasonal reproduction and latitudinal divergence with individual  
264 genotypes. For this, we genotyped 240 individuals (30 individuals from 8 locations) in 40 SNPs  
265 related to seasonal reproduction and 90 SNPs related to latitude using the Agena MassARRAY  
266 SNP genotyping platform (Agena Bioscience, Inc.). These SNPs were chosen considering these  
267 criteria: (i) top ranked based on importance values (Mean Decrease in Accuracy, MDA) obtained  
268 from the random forest algorithm (as described in the previous section), (ii) had  $\geq 150$  bp of  
269 flanking sequence for primer design, (iii) did not fall within or a few bases away from repetitive  
270 regions and had fewer than 4 flanking SNPs, (iv) when two or more top ranked SNPs were  
271 located within the same scaffold, the ones separated by  $\geq 1$ Kbp were kept, in an attempt to  
272 minimize redundancy in the panel). The application of these filters and the retrieval and  
273 preparation of DNA sequences for primer design for the Agena platform were performed with  
274 custom R scripts. A quality control of raw SNP genotypes was performed using PLINK (Purcell  
275 et al., 2007), in which SNPs and individuals with more than 20% missing data, and SNPs with  
276 minor allele frequency (MAF) lower than 0.01 were removed. We obtained a heatmap plot using  
277 the R function *heatmap.2* of the R package *gplots* for the visual inspection of individual genotype

278 patterns. File format conversions required for missing data filtering and heatmap plotting were  
279 conducted with PGDSpider (Lischer & Excoffier, 2012) and a custom python script (data was  
280 transformed to PLINK format, then to VCF file format, and finally to 0,1,2 format).

281

### 282 ***Functional annotation of outlier loci***

283 We investigated the potential effect on gene function of outlier SNPs associated with  
284 seasonal reproduction and the latitudinal cline using SNPeff v4.11 (build 2015-10-03) (Cingolani  
285 et al., 2012) [*default parameters*]. This program determines the position of a SNP with respect to  
286 the constituents of a nearby gene within 5Kbp (i.e. exons, introns, 5'-UTR region, etc.), and  
287 predicts its putative effect on gene and protein composition (i.e. synonymous and missense  
288 mutations, premature stop codon, etc., a complete list of effects is described in the program  
289 documentation). Variants located beyond 5Kbp of a gene were annotated as 'intergenic'. We  
290 based this analysis on the current herring genome assembly and annotations (Martinez Barrio et  
291 al., 2016). Further, we separately examined gene ontology (GO) terms of the genes annotated to  
292 the outlier loci most strongly associated with seasonal reproduction and the latitudinal cline (-  
293  $\log_{10}P\text{-value} \geq 7$ , equivalent to  $P\text{-value} \leq 1 \times 10^{-7}$ , lower threshold commonly used for significant  
294 association in human GWAS, (Fadista, Manning, Florez, & Groop, 2016; Panagiotou &  
295 Ioannidis, 2012). Details of the analysis performed on the GO terms can be found in the  
296 Supporting Information.

297

### 298 ***Genetic-Environment Association analysis***

299 We performed redundancy analysis (RDA) and random forest (RF) regressions to identify  
300 environmental variables significantly associated with spatial patterns of population divergence.

301 The environmental dataset used for these analyses consisted of sea surface temperature  
302 (SST), sea bottom temperature (SBT), and sea surface salinity (SSS) for winter, spring, summer  
303 and fall seasons, for a total of 12 oceanographic variables. These variables are relevant in  
304 population structuring of numerous marine species in the NW Atlantic (Stanley et al., 2018).

305  
306 To obtain environmental measures for each sampling location, we acquired monthly data  
307 layers of SST, SBT, and SSS between 2008-2017 from NEMO 2.3 (Nucleus for European  
308 Modelling of the Ocean), an oceanographic model developed by the Bedford Institute of  
309 Oceanography, Canada. A detailed description of oceanic (Madec, Delecluse, Imbard, & Levy,  
310 1998) and sea ice (Fichefet & Maqueda, 1997) model components can be found in Wang,  
311 Brickman, Greenan, & Yashayaev (2016) and Brickman, Hebert, & Wang (2018). Data layers  
312 were converted to an ASCII grid with a NAD83 projection (ellipse GRS80), they had a nominal  
313 resolution of 1/12o (~5km<sup>2</sup>), and a uniform land mask. Four seasonal bins, corresponding to  
314 winter (January-February-March), spring (April-May-June), summer (July-August-September),  
315 and fall (October-November-December), were averaged across 9 years in order to capture long-  
316 term trends of oceanographic variation. Data extraction for the 14 geo-referenced locations was  
317 conducted using custom R scripts (Stanley et al., 2018). Environmental data were standardized to  
318 zero mean and unit variance in R for downstream analysis. Collinearity between environmental  
319 variables was estimated with pairwise correlation coefficients computed with the function  
320 *pairs.panels* of the R package *psych* (Revelle, 2018) (Fig. S11), and with variance inflation  
321 factors (VIF) obtained from RDA models built with the R package *vegan* (Dixon, 2003). Prior to

322 RDA, the most collinear variables were removed based on biological/ecological criteria (Forester,  
323 Lasky, Wagner, & Urban, 2018). Subsequently, remaining collinear variables were identified and  
324 removed one by one in consecutive RDA runs based on their VIF. The variable with the highest  
325 VIF was discarded in each run until all variables had a  $VIF < 5$ , following recommendations by  
326 (Zuur, Ieno, & Elphick, 2010).

327  
328 For RDA, we used the reduced environmental data as constraining variables for the  
329 population allele frequencies of the top 500 outlier loci exhibiting the latitudinal pattern. RDA  
330 runs were performed with the R package *vegan*, following Jeffery et al. (2018) and Lehnert et al.  
331 (2018). Environmental variables that best explained genetic variance were identified using a bi-  
332 directional stepwise permutational ordination method (1000 iterations) implemented in the R  
333 function *ordistep*. Significance of the overall RDA model and of selected environmental variables  
334 was assessed with analysis of variance (ANOVA) using 1000 permutations. In order to estimate  
335 the proportion of the genetic variance independently explained by environment, geographic  
336 distance, or both, we performed variance partitioning using partial redundancy analysis (pRDA),  
337 either conditioned on geographic distance (Cartesian coordinates) or selected environmental  
338 variables, respectively. Cartesian coordinates of each location, equivalent to the pairwise least-  
339 cost geographic distance between locations accounting for land as barrier, were obtained with the  
340 R function *CartDist* (Stanley & Jeffery, 2017). Concordance between Cartesian and geographic  
341 coordinates was assessed with a linear regression (Fig. S3).

342  
343 For RF regressions, we used the population allele frequencies of each outlier locus as  
344 single response vectors and the 12 standardized environmental variables as predictors. A RF

345 regression was performed for each outlier locus with the R package *randomForest*, as described  
346 in Lehnert et al. (2018) and Sylvester et al. (2018). Default parameters for regression were  
347 applied to the RF runs ( $mtry = p/3$ , where  $p$  is the total number of predictors, or environmental  
348 variables in this case), except that  $ntree$  was set to 10,000. The selected number of trees to grow  
349 per run ( $ntree$ ) assured Mean Decrease in Accuracy (MDA) convergence, as demonstrated in a  
350 pilot test that compared MDA of predictors of 3 independent RF runs (correlation coefficient  $r =$   
351 0.9999, Fig. S4). Environmental variables were then ranked based on their relative importance to  
352 explain genetic variance from the averaged MDA values across loci, and the mean residual  
353 square error (MSE) of each location averaged across loci.

354

### 355 ***Isolation-by-distance pattern test***

356 To evaluate whether global (all loci) and latitude-related population structure (subset of  
357 loci) corresponded to an isolation-by-distance (IBD) pattern, we determined the significance of  
358 the association between geographic and genetic distances for all possible pairs of sampled  
359 spawning sites using Mantel tests (Mantel 1967) with 9999 permutations, implemented in the R  
360 package *ade4* (Dray & Dufour, 2007). Genetic distances were linearized ( $\hat{F}_{ST} = \frac{\hat{F}_{ST}}{1 - \hat{F}_{ST}}$ ) (Rousset,  
361 1997) with  $\hat{F}_{ST}$  computed using all SNPs identified across the genome, in the first case, or solely  
362 outlier SNPs strongly associated with latitudinal divergence, for the latter. Geographic distances  
363 were estimated with the R package *CartDist* (Stanley & Jeffery, 2017) as the least-coast oceanic  
364 distance in Km considering land as barrier.

365

366



367 **Results:**

368 ***Sampling distribution and pool-sequencing***

369 A total of 697 adult herring from 14 spawning aggregations distributed in and around  
370 Newfoundland and Labrador, the Gulf of St. Lawrence, Scotian Shelf, Bay of Fundy, and Gulf of  
371 Maine in the NW Atlantic were included in this study (Fig. 1A, Table 1). We aimed to include in  
372 the same pool only DNA from “ready-to-spawn” and “actively spawning” individuals collected  
373 in the same area [gonadal maturity stage 5 and 6, respectively, (Bucholtz, Tomkiewicz, &  
374 Dalskov, 2008)]. Yet, in some spawning aggregations (BDO-S, NDB-S, NDB-F, TRB-F, and  
375 ME4-F, see pie charts in Fig. 1A) 25-50% of individuals were in “maturing” (stage 4) or  
376 “resting” (stage 8) condition at the time of sampling. The designation of “S” or “F” in the  
377 location name thus only reflects the season of collection and not necessarily the actual spawning  
378 season of all fish included in the pool.

379  
380 A total of ~800 GB of raw sequence data were obtained. After quality filtering and  
381 adapter trimming, 6,119,940,640 reads of optimal quality (Phred score > 20) were available for  
382 the genomic analysis. Read mapping statistics indicated that > 98.8% of read-pairs were correctly  
383 aligned to the stitched version of the herring reference genome (mapping quality MQ > 48,  
384 median insert size of 527 bp) (Table S1), confirming that misalignment errors, if present, were  
385 negligible. Average read depth of coverage per pool ranged between 25x to 44x and varied  
386 between sequencing batches [2015 batch mean  $28.7 \pm 4.0$ , 2016 batch mean  $36.9 \pm 2.6$  (Table  
387 S1). We monitored the potential effect of coverage variation in downstream analysis, in particular  
388 for collections with lower coverage (TRB-S, NTS-S, and GEB-F). Variant calling resulted in

389 11,154,328 raw SNPs of which 2,189,380 passed quality filters and were retained for further  
390 analysis.

391

### 392 ***Population structure***

393 As observed in our previous study (Lamichhane et al., 2017), spawning aggregations in  
394 the NW Atlantic clustered according to reproductive season in a Neighbor-Joining tree, with  
395 spring and fall spawning collections forming separate groups (Fig. 1B), although a few  
396 exceptions were observed. BDO-S sample was in an intermediate position with respect to these  
397 two main clusters, and a spring-collected sample in Newfoundland (NDB-S) clustered with the  
398 fall group, suggesting it may be composed of a large proportion of fall spawners. A closer  
399 examination of the fall group revealed clustering according to latitude. Southern collections in the  
400 Scotian Shelf (MUS-F, GEB-F), Bay of Fundy (SCB-F), and Gulf of Maine (ME4-F) were  
401 separated from northern collections in the Gulf of St. Lawrence (MIR-F, BLS-F), Newfoundland  
402 (TRB-F, NDB-S, NDB-F) and Labrador (LAB-F). Such separation suggests genetic differences  
403 may exist between herring inhabiting these two geographic regions.

404

405 The pairwise fixation index  $F_{ST}$  for pools ( $\hat{F}_{ST}^{pool}$ ) ranged between 0.012 and 0.043,  
406 indicating low levels of genetic structure among the 14 spawning aggregations studied (Fig. 1C,  
407 pairwise  $F_{ST}$  values in Table S2). Nevertheless, three clear patterns of subtle genetic  
408 differentiation were noticeable: i) between spring and fall spawners (SIL-S, SPH-S, NTS-S, vs.  
409 others,  $\hat{F}_{ST}^{pool}$  0.022-0.043), ii) within spring spawners, the sample from the NW of the Gulf of St.  
410 Lawrence (SIL-S) was the most genetically distinguishable ( $\hat{F}_{ST}^{pool}$  ~0.030), and iii) within fall

411 spawners, the two southernmost collections (GEB-F and ME4-F) were the most divergent  
412 ( $\hat{F}_{ST}^{pool}$  0.020-0.031). In general, the largest genetic differentiation was observed between spring  
413 spawners and the most southern collections ( $\hat{F}_{ST}^{pool}$  ~0.040). Interestingly, the two spring-  
414 collected samples BDO-S and NDB-S (two samples presumably containing both spring and fall  
415 spawning individuals, see below) exhibited similar levels of differentiation ( $\hat{F}_{ST}^{pool}$  0.022-0.033)  
416 with samples comprising solely spring spawners (SIL-S, SPH-S, NTS-S) as with samples  
417 comprising solely fall spawners.

418

#### 419 ***Outlier loci detection and genome-wide patterns of differentiation***

420 A PCA-based whole-genome scan for the identification of SNPs putatively under  
421 selection revealed two main axes of genomic differentiation in NW Atlantic herring: spawning  
422 season, and geographic origin according to latitude. In a PCA plot based on 2,189,380 SNPs (Fig.  
423 1D), spring and fall spawning herring were distinguishable along the first principal component  
424 (PC1) (36% of variance explained). PC2 distinguished two collections, German Bank (GEB-F)  
425 and Northumberland Strait (NTS-S) from the rest (Fig. S5). These two collections exhibited the  
426 shallowest average sequencing coverage, suggesting this axis (PC2) is largely reflecting an  
427 artefact of sequencing. PC2 was therefore ignored (Fig. S5). On PC3, the southernmost  
428 collections, distributed on the Scotian Shelf, Bay of Fundy and Maine (MUS-F, SCB-F, GEB-F,  
429 ME4-F), were differentiated from the aggregations in the Gulf of St. Lawrence, Newfoundland,  
430 and Labrador (30% of the variance explained) that formed a tight cluster. The sample from Maine  
431 (ME4-F) was the most differentiated of all, followed by German Banks (GEB-F), the  
432 southernmost location sampled on the Scotian Shelf. Along PC1, BDO-S and SIL-S were

433 positioned in between the spring and fall spawners, BDO-S being closer to the fall samples and  
434 SIL-S to the spring samples. NBD-S clustered tightly with the fall spawners. In general, with the  
435 exception of the two southernmost samples (GEB-F and ME4-F), fall spawning aggregations  
436 grouped more closely together than the spring spawning ones, suggesting that more genetic  
437 differences may exist among the spring spawners than among fall spawners included in this  
438 study.

439  
440 In PC1, a total 14,724 outlier SNPs were detected (with Benjamini-Hochberg-adjusted  $P$ -  
441 values and  $FDR \leq 0.01$ ). A Manhattan plot depicting significance values ( $-\log_{10}P$ -value) of  
442 outlier loci for this PC disclosed numerous “peaks” or regions of divergence across the genome,  
443 spanning about 18 scaffolds and numerous genes (Fig. 2A). The top SNPs of these scaffolds were  
444 in the proximity of genes with known function in reproduction, such as *TSHR*, *ESRA*, *HERPUD2*,  
445 *CALM* (Martinez Barrio *et al.* 2016). Moreover, a new set of candidate genes linked to seasonal  
446 reproduction were *ISO3*, *SERTM1*, *SIPA1L1*, *CAMKK1*, *TMEM150C*, *CBLB*, *ENTPD5*, *KCNJ6*,  
447 *LPAR6* and *GPR119*, as they were near top outlier loci in the unique islands of differentiation  
448 only observed in the NW Atlantic (Lamichhaney *et al.*, 2017). A heatmap depicting standardized  
449 population allele frequencies of the top 200 outlier loci from the scaffolds identified with RF  
450 (ranked in descending order by  $-\log_{10}P$ -value) distinguished aggregations by spawning season  
451 (Fig. 2B), with fall spawners fixed for one allele and almost all spring spawners fixed for the  
452 alternative allele. The exceptions to this observation were three aggregations sampled in spring,  
453 BDO-S, SIL-S, and NDB-S. The first two collections exhibited allele frequencies around 0.5,  
454 while NDB-S showed population allele frequencies consistent with fall spawners. These results  
455 indicate that BDO-S and SIL-S either correspond to a mixture of spring and fall spawning

456 individuals or to hybrids or both, and that NDB-S should be considered as a sample of fall  
457 spawners, suggesting possible mislabeling.

458         In PC3, a total of 6,595 outlier loci were detected (with BH-adjusted  $P$ -values and  $FDR \leq$   
459 0.01). A Manhattan plot for this PC disclosed four main regions of divergence across the genome,  
460 corresponding to scaffolds 44, 122, 869 and 958, and a small number of outlier loci from other  
461 scaffolds (Fig. 2C). The top SNPs in the four main scaffolds were located within 5Kbp of the  
462 genes *FAM129B*, *FNBP1*, *SH3GLB2*, and *GPR107*. A heatmap representing standardized  
463 population allele frequencies of the top 200 outlier loci from the scaffolds identified with RF  
464 (ranked in descending order by  $-\log_{10}P$ -value) revealed contrasting genetic patterns according to  
465 latitude (Fig. 2D). In northern collections, including Labrador (LAB-F), Newfoundland (NDB-S,  
466 NDB-F, TRB-F, SPH-S), Gulf of St. Lawrence (BLS-F, SIL-S, MIR-F, NTS-S), Bras D'Or lake  
467 (BDO-S), and inner Bay of Fundy (SCB-F), one allele was close to fixation; in the southernmost  
468 collection, in Maine (ME4-F), the alternative allele was in high frequency; and in intermediate  
469 southern collections along the Scotian Shelf (MUS-F, GEB-F) allele frequencies were around  
470 0.5. An extended examination of population allele frequencies of the 14,724 outlier SNPs  
471 detected in PC1 (Fig. S8), revealed that additional SNPs from the four scaffolds showing the  
472 latitudinal pattern were present in PC1 and showed the same pattern as the ones found in PC3  
473 (3,378). Thus, these SNPs were removed from the PC1 set and added to the ones detected in PC3,  
474 for a total of 11,346 SNPs associated with seasonal reproduction and 9,973 SNPs associated with  
475 latitude.

476  
477         A closer examination of the genomic distribution of outlier SNPs revealed that seasonal  
478 reproduction-related outliers exhibited varying levels of significance ( $-\log_{10}P$ -value up to 30)

479 (Fig. 2A), were confined to a particular region within a scaffold (around 50-500 Kbp) and  
480 spanned a given set of genes (Fig. S6). In contrast, latitude-related outliers showed similar  
481 significance values ( $-\log_{10}P$ -value  $\sim 15$ ) (Fig. 2C), were widely spread along scaffolds (covering  
482 between 480 Kbp to 4.75 Mbp) and spanned numerous genes (Fig. S7).

483

484 ***Validation of a subset of outlier SNPs related to seasonal reproduction and to latitudinal***  
485 ***divergence***

486 A total of 230 individuals (NDB-F: 30, NDB-S: 29, SIL-S: 27, NTS-S: 30, BDO-S: 28,  
487 MUS-F: 29, GEB-F: 27, ME4-F: 30) and 52 and 74 SNPs related to seasonal reproduction and  
488 latitudinal divergence, respectively, passed the missing rate and MAF quality filters. Heatmaps  
489 depicting individual SNP genotypes for each of the two panels (Fig. S9) confirmed the overall  
490 patterns of population allele frequencies of the two axes of divergence detected with Pool-seq  
491 data (Fig. 2B,D), seasonal reproduction and latitude.

492 The SNP panel discriminating spawning season revealed that the spring-collected samples  
493 SIL-S and BDO-S corresponded to a mixture of spring and fall spawners and putative hybrids,  
494 the latter defined as heterozygous individuals at many of the loci showing a high degree of  
495 fixation between groups. SIL-S comprised an even proportion of pure fall spawners and putative  
496 hybrids with a few pure spring spawners, whereas BDO-S comprised mostly pure fall spawners  
497 and a few hybrids and spring spawners. The other spring-collected samples, NTS-S, consisted of  
498 mostly pure spring spawners and a few putative hybrids, while NDB-S corresponded to pure fall  
499 spawners. In contrast, all the fall-collected samples genotyped (NDB-F, MUS-F, GEB-F and  
500 ME4-F) corresponded to pure fall spawners, with a few heterozygous loci.

501           The SNP panel discriminating by latitude confirmed northern samples were characterized  
502 by high frequency of one allele, while the alternative allele had greater frequency in the  
503 southernmost sample (in Maine), although putative hybrids were present in both cases in varying  
504 proportions. Intermediate locations (BDO-S, MUS-F, GEB-F) exhibited a genotypic cline of  
505 increasing proportion of putatively hybrids towards the south.

506

### 507 *Functional annotation of outlier loci*

508           A total of 2,977 and 1,257 outlier SNPs associated with seasonal reproduction and  
509 latitudinal divergence, respectively, were annotated with respect to a neighboring gene (within  
510 5Kbp). For both cases, the majority of outlier SNPs were located within introns and intergenic  
511 regions, or 5Kbp upstream or downstream of genes (Fig. 3A). A small number of outlier SNPs  
512 were predicted as synonymous (~2%) or missense variants (1.6% and 0.9%, for spawning- and  
513 latitude-related outliers, respectively).

514           Excluding intergenic variants and genes that did not correspond to an orthologous gene in  
515 zebrafish, a list of 298 and 182 genes associated with seasonal reproduction and latitudinal  
516 divergence in herring, respectively, resulted from the annotated outlier loci. For seasonal  
517 reproduction-related genes, 126 had a GO term in the biological process category, 109 in the  
518 cellular component category, and 120 in the molecular function category (Fig. S10A). For  
519 latitude-related genes, 90 had a GO term in the biological process category, 72 in the cellular  
520 component category, and 80 in the molecular function category; considered together, close to half  
521 of the genes lacked GO classification. A comprehensive description of particular functions within  
522 the three GO categories and the number of genes in each of them is presented in Fig. S10B).

523 The overrepresentation enrichment analysis (ORA) of both sets of candidate genes did not  
524 reach statistical significance (FDR of 5%) (Table S3 and S4), likely due to the large number of  
525 genes lacking GO annotation (Fig. S10). However, a closer examination of the top GO terms with  
526  $P$ -value  $< 0.05$  (ranked in ascending  $P$ -values from ORA, Table S3 and S4, GO terms indicated  
527 with an asterisk), suggested that seasonal reproduction-related candidate genes may participate in  
528 biological processes such as metabolism of lipids, cell adhesion, biosynthesis of cellular  
529 products, peptidyl-aminoacid modification, protein complex biogenesis, inositol lipid-mediated  
530 signaling, developmental maturation, regulation of developmental process, and cellular  
531 component organization (Fig. 3B-top, Table S3). These genes might primarily act in cellular  
532 components such the endoplasmic reticulum and the whole membrane (Fig. 3B-middle) and play  
533 a molecular function related to cell adhesion molecule and protein binding and lipid transporter  
534 and transferase activities (Fig. 3B-bottom). The top GO terms of candidate genes associated with  
535 latitudinal divergence were all involved in embryological and organ development processes (Fig.  
536 3C-top, Table S4). These genes might act in cellular components such phosphatase complex,  
537 collagen trimer, and in the extracellular region (Fig. 3C-middle), and participate in sulfur  
538 compound binding and hydrolase and isomerase activities (Fig. 3C-bottom).

539

#### 540 ***Genome-Environment Association analysis***

541 Collinearity among several of the environmental variables examined and redundancy  
542 analyses (See Supporting Information) allowed us to reduce the environmental data set to just  
543 three variables: summer SBT, winter SST, and spring SSS. RDA indicated that winter SST  
544 (Win\_SST) (Fig. 4A) was the environmental variable that best explained the genetic variance of  
545 outlier loci exhibiting the latitudinal cline ( $F = 16.7$ ,  $p = 0.001$ , from *ordistep* function) (Fig. 4B).



546 No other temperature or salinity variable in the reduced environmental dataset was significant  
547 (from ANOVA with 1000 permutations, significance value = 0.05). Spawning aggregations were  
548 separated according to Win\_SST on RDA axis 1, which explained 58.1% of the total genetic  
549 variance ( $R^2 = 0.58$ , adjusted  $R^2 = 0.55$ ). pRDA however, showed that the Win\_SST-based RDA  
550 model was no longer significant when the effect of geographic distance between sites was  
551 removed from the model. A variance partitioning analysis revealed that the interaction between  
552 environment and geographic distance explained the greatest proportion of clinal genetic variation  
553 (44.9%).

554  
555 In agreement with RDA results, RF regressions also indicated that Win\_SST was the most  
556 important environmental variable (MDA = 23.5), followed by Fall\_SST (MDA = 21.8) (Fig. 4C).  
557 The other temperature variables had lower importance (MDA < 10), and salinity measures were  
558 the least important of all (MDA < 5). ME4-F, the southernmost spawning aggregation sampled,  
559 exhibited the highest mean square error (MSE = 0.21), followed by SCB-F and MUS-F (MSE ~  
560 0.05), whereas the other 10 collections had lower MSE, below 0.03 (Fig. 4D).

561  
562 A closer examination of the map of the NW Atlantic depicting average Win\_SST over the  
563 last 9 years and the predominant population allele frequency of the 14 sites studied (Fig. 4A),  
564 revealed that herring in “northern” collections in the Bay of Fundy, the Gulf of St. Lawrence, and  
565 Newfoundland and Labrador were characterized by being exposed to temperatures below zero (-2  
566 °C), whereas in “southern” collections they were mainly exposed to temperatures above zero (>2  
567 °C).

568

569 ***Isolation-by-distance test***

570           The Mantel test showed there is not a significant linear relationship between geographic  
571 and genetic distances for all loci across the genome ( $R^2 = 0.04$ ), whereas there is a significant  
572 linear relationship ( $R^2 = 0.30$ ) between geographic distance and genetic differentiation when only  
573 looking at outlier SNPs exhibiting the latitudinal break in population allele frequencies between  
574 northern and southern collections (Fig. 5).

575

576 **Discussion:**

577           Here we described patterns of genetic variation at the whole-genome level in Atlantic  
578 herring populations distributed across the reproductive range of the species in North America.  
579 This study represents the most comprehensive assessment of this kind in the region to date. We  
580 uncovered fine-scale population structure at outlier loci putatively under selection, despite low  
581 differentiation at selectively neutral loci. This observation is consistent with previous genetic  
582 work on herring in both, the NE (Guo et al., 2016; Lamichhaney et al., 2012; Limborg et al.,  
583 2012; Martinez Barrio et al., 2016; Teacher, André, Jonsson, & Merilä, 2013) and the NW  
584 Atlantic (Lamichhaney et al., 2017; McPherson et al., 2004; McPherson, Stephenson, O'Reilly,  
585 Jones, & Taggart, 2001). The large population sizes, high potential for gene flow, and minute  
586 effect of genetic drift explain the low genetic differentiation observed at neutral loci (Palumbi,  
587 1994). These conditions also favor the more efficient action of natural selection, which seems to  
588 be behind the genetic differences observed at outlier loci.

589

590           While prior genomic studies disclosed genetic structure with seasonal reproduction and  
591 salinity (Lamichhaney et al., 2012; Martinez Barrio et al., 2016), and others suggested structuring

592 along the salinity/temperature gradient in the Baltic Sea from dozens of markers While prior  
593 genomic studies disclosed genetic structure with seasonal reproduction and salinity  
594 (Lamichhaney et al., 2012; Martinez Barrio et al., 2016), and others suggested structuring along  
595 the salinity/temperature gradient in the Baltic Sea from a dozens of markers (Gaggiotti et al.,  
596 2009; Guo et al., 2016; Limborg et al., 2012), here we successfully disentangled two main  
597 overlapping axes of divergence supported by thousands of outlier SNPs: seasonal reproduction  
598 and a latitudinal cline defining a north-south genetic break. Our genetic-environment association  
599 analyses indicated that winter sea-surface temperature is the best predictor of the spatial structure  
600 observed. These results: demonstrate for the first time that herring from the north (Labrador,  
601 Newfoundland, Gulf of St. Lawrence and Bay of Fundy) are genetically distinguishable from the  
602 ones in the south (Scotian Shelf and Maine) regardless of their spawning season; indicating that  
603 thermal-minima related factors are likely driving latitudinal genetic differentiation; and provide  
604 additional evidence supporting the recently described multispecies biogeographic break in eastern  
605 Nova Scotia (Stanley et al. 2018).

606

607 Outlier SNPs exhibited remarkable clustering, forming so-called “genomic regions of  
608 divergence” (Nosil, Funk, & Ortiz-Barrientos, 2009; T. L. Turner, Hahn, & Nuzhdin, 2005), and  
609 extreme allele frequency differences (i.e. alternative alleles were close to fixation in either spring-  
610 or fall-spawning, or in northern- or the southernmost populations). Theory predicts that formation  
611 of genomic regions of divergence (Schluter, 2009; Wu, 2001) and fixation of different alleles  
612 conducive to opposing phenotypes often result from natural selection acting in contrasting  
613 directions between environments (Vitti, Grossman, & Sabeti, 2013). Considering the  
614 heterogeneous environmental properties of the Northwest Atlantic (Melvin et al., 2009;

615 Townsend et al., 2004) and having discarded an effect of genetic drift and an isolation-by-  
616 distance pattern, we conclude that disruptive selection may be the main evolutionary force  
617 involved in population structuring in the region.

618         A few exceptions to the allele fixation pattern were observed in both axes of divergence.  
619 In seasonal reproduction outliers, two aggregations sampled in spring, BDO-S and SIL-S,  
620 exhibited allele frequencies around 0.5 at SNPs being closed to fixation for opposite alleles in  
621 other populations of spring- and fall-spawning herring. This observation suggests these  
622 collections either correspond to a mixture of spring- and fall-spawners, or to a unique population  
623 where allele diversity is favored. Individual genotypes of a subset of diagnostic SNPs of  
624 spawning time confirmed BDO-S and SIL-S comprised a mixture of spring and fall spawners and  
625 putative hybrids (i.e. heterozygous individuals at many of the loci showing a high degree of  
626 fixation between groups). In latitude-related outliers, intermediate allele frequencies were  
627 observed in MUS-F and GEB-F, two locations in southwestern Nova Scotia, mid-range in the  
628 latitudinal cline. Interestingly, these locations are few kilometers south of the biographic barrier  
629 described in the NW Atlantic (Stanley et al., 2018). Environmental conditions in the NW Atlantic  
630 vary between years in relation to oceanographic global trends (Townsend et al., 2004). It is  
631 possible then that populations in southwestern Nova Scotia experience significant inter-annual  
632 environmental fluctuations during winter months, depending on the strengthening either of the  
633 warm Gulf Stream flowing north or of the cold Labrador Current flowing south. Under these  
634 dynamic circumstances, it is possible that balancing selection may be maintaining polymorphism  
635 at these loci. Additional studies including an extended sampling in the southern region could be  
636 used to test this hypothesis.

637

638           A closer examination of the genomic regions of divergence revealed they vary in size and  
639 genomic location between the two axes of divergence. Seasonal reproduction-related outliers  
640 were distributed across 18 scaffolds in which they spanned about 50-500 Kbp and a given set of  
641 genes. In contrast, latitude-related outliers were mostly spread in four scaffolds, covering a larger  
642 extension, from 480 Kbp to 4.75 Mbp, and larger number of genes. The observation that latitude-  
643 related outliers were widely distributed and consistently divergent across four large scaffolds  
644 suggests that they could be located within a chromosomal rearrangement. If this were the case,  
645 the expectation would be that populations from the north were homozygous for one state of the  
646 variant, the ones in southwest Nova Scotia were polymorphic, and in the Gulf of Maine were  
647 homozygous for the alternative state of the variant. Further research supported by a linkage map,  
648 not described yet for herring, is required for the evaluation of this hypothesis.

649  
650           A bioinformatic evaluation of the functional effect of outlier SNPs disclosed that, for both  
651 axes of divergence, the majority of SNPs were located within introns, intergenic regions, and  
652 5Kbp upstream or downstream of genes, and a smaller proportion corresponded to missense  
653 mutations (1,6% and 0.9%, for spawning- and latitude-related outliers, respectively). Mutations  
654 in introns can modify regulatory domains, intron-exon boundaries and RNA splicing (Pagani &  
655 Baralle, 2004); missense mutations result in a different amino acid; and mutations in regulatory  
656 elements can modify gene expression (Epstein, 2009; Metzger et al., 2016; M. Nei, 2007). While  
657 at this point is not possible to trace a direct link between single SNPs and gene function or  
658 identify causal mutations, our observations suggest that single base changes in introns, protein-  
659 coding, and regulatory regions may be involved in adaptive divergence in NW Atlantic herring,  
660 in agreement with previous observations in the NE Atlantic (Martinez Barrio et al., 2016).

661 Gene annotation of top outlier SNPs confirmed that *TSHR*, *HERPUD2*, *SOX1*, *SOX11A*,  
662 *SYNE1*, *SYNE2*, and *ESR2A* are candidate genes related to seasonal reproduction. These genes  
663 have a known function in reproduction and were previously linked to spawning time in NE  
664 Atlantic herring (Lamichhaney et al., 2017; Martinez Barrio et al., 2016). We discovered an  
665 additional set of candidate genes, *ISO3*, *SERTM1*, *SIPA1L1*, *CAMKK1*, *TMEM150C*, *CBLB*,  
666 *ENTPD5*, *KCNJ6*, *LPAR6* and *GPR119*, corresponding to the genomic regions of differentiation  
667 uniquely observed in the NW Atlantic (Lamichhaney et al., 2017), hence, they can potentially be  
668 involved in local adaptation. Candidate genes related with the latitudinal cline are *FAM129B*,  
669 *FNBP1*, *SH3GLB2*, and *GPR107*.

670 A qualitative examination of the top ranked GO terms indicated that candidate genes  
671 related to seasonal reproduction may be involved in biological processes such as metabolism of  
672 lipids, biosynthesis of cellular products, developmental maturation, regulation of developmental  
673 process, and cellular component organization. Similarly, latitude-related candidate genes may  
674 participate in embryological and organ development processes. These observations suggest that  
675 outlier SNPs underlying the two axes of divergence may be involved in different physiological  
676 pathways, and that natural selection along the latitudinal cline likely acts on early life stages, in  
677 agreement with the proposed hypothesis for the multispecies climatic cline (Stanley et al., 2018).  
678 It is likely that early life stages experience selection along the latitudinal cline given that larval  
679 retention areas are in the proximity of spawning grounds (Stephenson et al., 2009). If selection  
680 would act on juveniles or adults, which are highly migratory, then the pattern should not coincide  
681 with spawning locations.

682

683           We provide genetic evidence that suggests timing of reproduction and latitudinal  
684 spawning location are features under disruptive selection leading to local adaptation. Several  
685 characteristics of herring biology and ecology seem to support this. For instance, (i) spawning  
686 occurs at predictable times and locations, the timing differs among geographic regions  
687 (Stephenson et al., 2009), and there is no evidence indicating that individual fish can switch  
688 spawning season (Melvin et al., 2009); (ii) herring spawns once a year and exhibits spawning site  
689 fidelity (Wheeler & Winters, 1984); (iii) spring- and fall-spawners differ in morphometric  
690 characters, in life-history traits (fecundity, egg size and growth), and in phenotypic traits (number  
691 of vertebrae and otolith shape) (Baxter, 1959; Cushing, 1967; Messieh, Anthony, & Sinclair,  
692 1985); growth rate, otolith shape, and vertebral counts seem to be largely influenced by genetic  
693 factors (Berg et al., 2018); (iv) early life stages spawned in different seasons and locations  
694 experience contrasting environmental conditions (e.g. in the Gulf of St. Lawrence, eggs released  
695 by spring spawners hatch after 30 days at 5°C, while eggs of fall spawners hatch after 10 days at  
696 15°C; in Nova Scotia, eggs of fall spawners hatch in 11 days at 10°C) (Scott & Scott, 1988); (v)  
697 larval retention areas occur near spawning grounds and are stable over time, in predictable  
698 patterns related to oceanographic conditions (Stephenson et al., 2009); and (vi) genetic  
699 differences between spring- and fall-spawners are temporally stable (Kerr et al., 2018). From this,  
700 we then infer that timing of reproduction and latitudinal spawning location can be adaptive  
701 strategies to increase offspring survival, particularly at vulnerable early life stages, in  
702 environments that vary seasonally and geographically. When timing of reproduction is largely  
703 heritable, the resulting temporal assortative mating may reduce gene flow between individuals  
704 breeding at different times (Hendry & Day, 2005). In herring, gene flow may be limited between  
705 early spring-spawners and late fall-spawners even if they are in sympatry (as their gonads are not

706 ripe at the same time, as we observed in our samples). How do hybrids occur? We hypothesize  
707 hybridization could happen between late spring-spawners and early fall-spawners at geographic  
708 areas where both reproductive strategies coexist (e.g. in the Gulf of St. Lawrence), and when the  
709 onset of gonadal maturation coincides (likely temperature driven). Hybrids would survive then, if  
710 they can cope with the local environmental conditions.

711         Although disruptive selection is a strong candidate for explaining latitudinal divergence in  
712 herring, other mechanisms are possible. For example, additional biotic or abiotic factors that  
713 covariate with temperature may be the actual drivers of adaptation. Pre- or post-zygotic  
714 reproductive incompatibilities that coincide with latitude (but are not dependent on) can result in  
715 the observed spatial genetic discontinuity (Bierne, Welch, Loire, Bonhomme, & David, 2011).  
716 The current latitudinal break may actually reflect historical vicariance (Bradbury et al., 2010), not  
717 contemporary population dynamics (Palumbi, 1994). Further studies are required to evaluate  
718 these alternative hypotheses.

719  
720         Even though valuable information was obtained through this study, there were some  
721 limitations. In Pool-seq individual information is missed, thus it is not possible to correct  
722 accidental mixing of individuals with different origin/spawning season. To avoid this, we  
723 selected maturing and ripe fish collected in known spawning grounds during the local peak of  
724 reproduction. Despite these precautions, we found evidence of some mixed aggregations (SIL-S  
725 and BDO-S). Moreover, in the over-representation enrichment analysis statistical significance  
726 was not reached. This outcome may have been influenced by the restriction that only herring  
727 candidate genes with an zebrafish ortholog could be included, and that half of the total genes  
728 mapped to zebrafish lacked a GO term. We expect with a more complete reference genome and



729 annotations, along with functional experiments, a better functional characterization of outlier loci  
730 will be achieved.

731

732 Our findings have several implications and potential applications in fisheries. Firstly, our  
733 results support the maintenance of separate management of spring- and fall-spawning  
734 components currently in place across most of the region. Secondly, management units should be  
735 revised in order to protect the functional intraspecific biodiversity revealed in this study,  
736 specifically considering a climate change scenario as spring-spawners seem to be less resilient to  
737 a warming ocean (Melvin et al., 2009). Thirdly, as we now have the molecular tools to  
738 distinguish herring spawning in spring or autumn and in northern and southern regions, a subset  
739 of outlier SNPs reported here can be used for genetic monitoring of stock composition already at  
740 the larval stage and out of breeding seasons to minimize the risk of overexploitation of vulnerable  
741 components within mixed stocks. And lastly, the current herring population models could be  
742 revised as none of them are in complete agreement with our genetic data, as similarly noted by  
743 McPherson et al. (2004). For instance, the discrete population concept proposes that gene flow is  
744 limited, hybrids have reduced fitness, and local populations are reproductively isolated by fixed  
745 spawning time, natal homing, spawning site fidelity, and larval retention areas with particular  
746 hydrographic features (Sinclair, 1988; Sinclair & Iles, 1989). While our data agrees with most of  
747 this, the presence of numerous putative hybrids suggests that gene flow may be more extensive  
748 than expected under this model and they are viable. In the dynamic balance population concept  
749 there is significant gene flow, no stable population structure, no fixed spawning time, no  
750 philopatry, no larval retention areas, as populations respond to changing environmental  
751 conditions (Smith & Jamieson, 1986). The temporal and spatial structuring we observed is

752 opposite to this model. And in the metapopulation concept (adopted migrant) there is repeated  
753 homing to traditional spawning grounds defined by hydrographic features, migration and homing  
754 patterns are socially transmitted, and significant gene flow can occur as vagrants are adopted by  
755 non-natal local populations (McQuinn, 1997). This model implies an isolation-by-distance  
756 pattern and that spawning time is not genetically determined (it is learned), contrary to our  
757 observations.

758

759 In summary, our results confirm that Atlantic herring is a model system for the study of  
760 ecological adaptation with gene flow in the wild (Lamichhaney et al., 2017; Martinez Barrio et  
761 al., 2016), and provide insight into patterns and mechanisms of genomic divergence and local  
762 adaptation despite gene flow in an abundant and highly dispersive marine fish.

763

764

765 **Acknowledgements:** We thank staff at Fisheries and Oceans Canada, the Maine Department of  
766 Resources, Comeau's Seafoods Ltd, Cape Breeze Seafoods Ltd, and fishers Crystal and Donald  
767 Kent, Gordon McKay, and many others for their valuable contribution in sample collection.  
768 Thanks to Gregory McCracken for assistance in sampling and DNA extraction, to Gavin  
769 Douglas, Emma Sylvester, Sarah Lehnert, Ryan Stanley, Simone Fior, Alan Bergland, Miguel  
770 Carneiro, Michael Blum, and Mathieu Gautier for data analysis assistance. Many thanks to Ryan  
771 Stanley for obtaining the oceanographic data layers used in this study. Library preparation and  
772 shotgun sequencing was performed in The Centre for Applied Genomics of the Hospital for Sick  
773 Children, Canada. Computations were conducted on the supercomputer Mp2 of the University of  
774 Sherbrooke, managed by Calcul Québec and Compute Canada and funded by the Canada

775 Foundation for Innovation (CFI), the ministère de l'Économie, de la science et de l'innovation du  
776 Québec (MESI) and the Fonds de recherche du Québec - Nature et technologies (FRQ-NT).  
777 A.P.F.P. and D.E.R. thank the Killam Trust. A.P.F.P. thanks the Vanier Canada Graduate  
778 Scholarship, the President's Award of Dalhousie University, the Nova Scotia Graduate  
779 Scholarship, the Lett Fund and a Strategic grant to D.E.R for graduate studies funding. This study  
780 was funded by NSERC Discovery and Strategic grants to D.E.R.

781  
782 **Data accessibility:** Oceanographic data, and population-allele frequencies and individual SNP  
783 genotype data for this study will be available in Dryad upon publication acceptance. Bash, python  
784 and R scripts are available upon request to the authors.

785  
786 **Author contributions:** D.E.R. and A.P.F.P. designed and conceived the study; C.B., R.S., K.E.,  
787 L.P., and J.L.M provided herring samples; A.P.F.P contributed to tissue collection and  
788 processing, and performed lab work and bioinformatics data analysis; D.E.R and L.A.  
789 contributed to the interpretation of results; A.P.F.P. wrote the manuscript with input from D.E.R.  
790 and L.A. All authors vetted and approved the manuscript before submission.

791  
792 **Competing interests:** The authors declare no competing financial interests.

793

794 **References:**

- 795
- 796 Allendorf, F. W., Hohenlohe, P. A., & Luikart, G. (2010). Genomics and the future of conservation  
797 genetics. *Nature Reviews Genetics*, *11*(10), 697–709. <https://doi.org/10.1038/nrg2844>
- 798 Andersson, L., Ryman, N., Rosenberg, R., & Ståhl, G. (1981). Genetic variability in Atlantic herring  
799 (*Clupea harengus harengus*): description of protein loci and population data. *Hereditas*, *95*(1), 69–  
800 78. <https://doi.org/10.1111/j.1601-5223.1981.tb01330.x>
- 801 André, C., Larsson, L. C., Laikre, L., Bekkevold, D., Brigham, J., Carvalho, G. R., ... Ryman, N. (2011).  
802 Detecting population structure in a high gene-flow species, Atlantic herring (*Clupea harengus*):  
803 direct, simultaneous evaluation of neutral vs putatively selected loci. *Heredity*, *106*(2), 270–280.  
804 <https://doi.org/10.1038/hdy.2010.71>
- 805 Andrews, S. (2010). FastQC: a quality control tool for high throughput sequence data. Retrieved May 1,  
806 2018, from <http://www.bioinformatics.babraham.ac.uk/projects/fastqc>
- 807 Barrett, R. D. H., & Hoekstra, H. E. (2011). Molecular spandrels: tests of adaptation at the genetic level.  
808 *Nature Review Genetics*, *12*(11), 767–780. <https://doi.org/10.1038/nrg3015>
- 809 Baum, B. R. (1989). PHYLIP: Phylogeny Inference Package. Version 3.2 . Joel Felsenstein. *The*  
810 *Quarterly Review of Biology*, *64*(4), 539–541. <https://doi.org/10.1086/416571>
- 811 Baxter, I. G. (1959). Fecundities of winte-spring and summer-autumn herring spawners. *J. Cons. Int.*  
812 *Explor. Mer.*, *25*, 73–80.
- 813 Benestan, L., Gosselin, T., Perrier, C., Sainte-Marie, B., Rochette, R., & Bernatchez, L. (2015). RAD  
814 genotyping reveals fine-scale genetic structuring and provides powerful population assignment in a  
815 widely distributed marine species, the American lobster (*Homarus americanus*). *Molecular Ecology*,  
816 *24*(13), 3299–3315. <https://doi.org/10.1111/mec.13245>
- 817 Benoît, H., Swain, D., Hutchings, J., Knox, D., Doniol-Valcroze, T., & Bourne, C. (2018). Evidence for  
818 reproductive senescence in a broadly distributed harvested marine fish. *Marine Ecology Progress*  
819 *Series*, *592*, 207–224. <https://doi.org/10.3354/meps12532>
- 820 Berg, F., Almeland, O. W., Skadal, J., Slotte, A., Andersson, L., & Folkvord, A. (2018). Genetic factors  
821 have a major effect on growth, number of vertebrae and otolith shape in Atlantic herring (*Clupea*  
822 *harengus*). *PLOS ONE*, *13*(1), e0190995. <https://doi.org/10.1371/journal.pone.0190995>
- 823 Bierne, N., Welch, J., Loire, E., Bonhomme, F., & David, P. (2011). The coupling hypothesis: Why  
824 genome scans may fail to map local adaptation genes. *Molecular Ecology*, *20*(10), 2044–2072.  
825 <https://doi.org/10.1111/j.1365-294X.2011.05080.x>
- 826 Bolger, A. M., Lohse, M., & Usadel, B. (2014). Trimmomatic: a flexible trimmer for Illumina sequence  
827 data. *Bioinformatics*, *30*(15), 2114–2120. <https://doi.org/10.1093/bioinformatics/btu170>
- 828 Bourne, C., Mowbray, F., Squires, B., & Koen-Alonso, M. (2018). 2017 Assessment of Newfoundland  
829 east and south coast Atlantic herring (*Clupea harengus*) stock complexes. *DFO Can. Sci. Advis. Sec.*  
830 *Res. Doc. 2018/026*, v + 45 p.
- 831 Bradbury, I. R., Hubert, S., Higgins, B., Borza, T., Bowman, S., Paterson, I. G., ... Bentzen, P. (2010).  
832 Parallel adaptive evolution of Atlantic cod on both sides of the Atlantic Ocean in response to  
833 temperature. *Proceedings of the Royal Society of London B: Biological Sciences*, *277*(1701), 3725–  
834 3734. <https://doi.org/10.1098/rspb.2010.0985>
- 835 Bradbury, I. R., Hubert, S., Higgins, B., Bowman, S., Borza, T., Paterson, I. G., ... Bentzen, P. (2013).  
836 Genomic islands of divergence and their consequences for the resolution of spatial structure in an  
837 exploited marine fish. *Evolutionary Applications*, *6*(3), 450–461. <https://doi.org/10.1111/eva.12026>
- 838 Brickman, D., Hebert, D., & Wang, Z. (2018). Mechanism for the recent ocean warming events on the  
839 Scotian Shelf of eastern Canada. *Continental Shelf Research*, *156*, 11–22.  
840 <https://doi.org/10.1016/j.csr.2018.01.001>
- 841 Britten, G. L., Dowd, M., & Worm, B. (2016). Changing recruitment capacity in global fish stocks.  
842 *Proceedings of the National Academy of Sciences*, *113*(1), 134–139.

- 843 <https://doi.org/10.1073/pnas.1504709112>
- 844 Bucholtz, R. H., Tomkiewicz, J., & Dalskov, J. (2008). *Manual to determine gonadal maturity of herring*
- 845 (*Clupea harengus* L.). DTU Aqua-report. Retrieved from
- 846 [http://scholar.google.com/scholar?hl=en&btnG=Search&q=intitle:Manual+to+determine+gonadal+](http://scholar.google.com/scholar?hl=en&btnG=Search&q=intitle:Manual+to+determine+gonadal+maturity+of+herring+(Clupea+harengus+L.)#0)
- 847 [maturity+of+herring+\(Clupea+harengus+L.\)#0](http://scholar.google.com/scholar?hl=en&btnG=Search&q=intitle:Manual+to+determine+gonadal+maturity+of+herring+(Clupea+harengus+L.)#0)
- 848 Cingolani, P., Platts, A., Wang, L. L., Coon, M., Nguyen, T., Wang, L., ... Ruden, D. M. (2012). A
- 849 program for annotating and predicting the effects of single nucleotide polymorphisms, SnpEff. *Fly*,
- 850 6(2), 80–92. <https://doi.org/10.4161/fly.19695>
- 851 Cushing, D. H. (1967). The grouping of herring populations. *J. Mar. Biol. Ass., U.K.*, 47, 193–208.
- 852 DFO. (1997). *State of the Ocean: Northwest Atlantic. DFO Science Stock Status Report G0-01*. Retrieved
- 853 from
- 854 <https://login.proxy.lib.duke.edu/login?url=https://search.proquest.com/docview/1668269133?account>
- 855 [id=10598%0Ahttp://pm6mt7vg3j.search.serialssolutions.com?ctx\\_ver=Z39.88-](https://login.proxy.lib.duke.edu/login?url=https://search.proquest.com/docview/1668269133?account)
- 856 [2004&ctx\\_enc=info:ofi/enc:UTF-8&rft\\_id=info:sid/ProQ%3Aasfabiological&rft\\_val\\_fmt=info](https://login.proxy.lib.duke.edu/login?url=https://search.proquest.com/docview/1668269133?account)
- 857 Dixon, P. (2003). VEGAN, a package of R functions for community ecology. *Journal of Vegetation*
- 858 *Science*, 14(6), 927–930. <https://doi.org/10.1111/j.1654-1103.2003.tb02228.x>
- 859 Dohm, J. C., Lottaz, C., Borodina, T., & Himmelbauer, H. (2008). Substantial biases in ultra-short read
- 860 data sets from high-throughput DNA sequencing. *Nucleic Acids Research*, 36(16), e105–e105.
- 861 <https://doi.org/10.1093/nar/gkn425>
- 862 Dray, S., & Dufour, A.-B. (2007). The ade4 Package: Implementing the Duality Diagram for Ecologists.
- 863 *Journal of Statistical Software*, 22(4). <https://doi.org/10.18637/jss.v022.i04>
- 864 Engelhard, G. H., & Heino, M. (2004). Maturity changes in Norwegian spring-spawning herring before,
- 865 during, and after a major population collapse. *Fisheries Research*, 66(2–3), 299–310.
- 866 [https://doi.org/10.1016/S0165-7836\(03\)00195-4](https://doi.org/10.1016/S0165-7836(03)00195-4)
- 867 Epstein, D. J. (2009). Cis-regulatory mutations in human disease. *Briefings in Functional Genomics and*
- 868 *Proteomics*, 8(4), 310–316. <https://doi.org/10.1093/bfgp/elp021>
- 869 Ewels, P., Magnusson, M., Lundin, S., & Källner, M. (2016). MultiQC: summarize analysis results for
- 870 multiple tools and samples in a single report. *Bioinformatics*, 32(19), 3047–3048.
- 871 <https://doi.org/10.1093/bioinformatics/btw354>
- 872 Fadista, J., Manning, A. K., Florez, J. C., & Groop, L. (2016). The (in)famous GWAS P-value threshold
- 873 revisited and updated for low-frequency variants. *European Journal of Human Genetics*, 24(8),
- 874 1202–1205. <https://doi.org/10.1038/ejhg.2015.269>
- 875 FAO. (2019). Species Fact Sheets: *Clupea harengus* (Linnaeus, 1758). Retrieved from
- 876 <http://www.fao.org/fishery/species/2886/en>
- 877 Feder, A. F., Petrov, D. A., & Bergland, A. O. (2012). LDx: Estimation of Linkage Disequilibrium from
- 878 High-Throughput Pooled Resequencing Data. *PLoS ONE*, 7(11), e48588.
- 879 <https://doi.org/10.1371/journal.pone.0048588>
- 880 Fichet, T., & Maqueda, M. A. M. (1997). Sensitivity of a global sea ice model to the treatment of ice
- 881 thermodynamics and dynamics. *Journal of Geophysical Research: Oceans*, 102(C6), 12609–12646.
- 882 <https://doi.org/10.1029/97JC00480>
- 883 Forester, B. R., Lasky, J. R., Wagner, H. H., & Urban, D. L. (2018). Comparing methods for detecting
- 884 multilocus adaptation with multivariate genotype–environment associations. *Molecular Ecology*,
- 885 27(9), 2215–2233. <https://doi.org/10.1111/mec.14584>
- 886 Gaggiotti, O. E., Bekkevold, D., Jørgensen, H. B. H., Foll, M., Carvalho, G. R., Andre, C., & Ruzzante, D.
- 887 E. (2009). Disentangling the effects of evolutionary, demographic, and environmental factors
- 888 influencing genetic structure of natural populations: Atlantic herring as a case study. *Evolution*,
- 889 63(11), 2939–2951. <https://doi.org/10.1111/j.1558-5646.2009.00779.x>
- 890 Goldstein, B. A., Hubbard, A. E., Cutler, A., & Barcellos, L. F. (2010). An application of Random Forests
- 891 to a genome-wide association dataset: Methodological considerations & new findings. *BMC*

- 892 *Genetics*, 11(1), 49. <https://doi.org/10.1186/1471-2156-11-49>
- 893 Gu, Z., Eils, R., & Schlesner, M. (2016). Complex heatmaps reveal patterns and correlations in  
894 multidimensional genomic data. *Bioinformatics*, 32(18), 2847–2849.  
895 <https://doi.org/10.1093/bioinformatics/btw313>
- 896 Guo, B., Li, Z., & Merilä, J. (2016). Population genomic evidence for adaptive differentiation in the Baltic  
897 Sea herring. *Molecular Ecology*, 25(12), 2833–2852. <https://doi.org/10.1111/mec.13657>
- 898 Hauser, L., & Carvalho, G. R. (2008). Paradigm shifts in marine fisheries genetics: ugly hypotheses slain  
899 by beautiful facts. *Fish and Fisheries*, 9(4), 333–362. [https://doi.org/10.1111/j.1467-](https://doi.org/10.1111/j.1467-2979.2008.00299.x)  
900 [2979.2008.00299.x](https://doi.org/10.1111/j.1467-2979.2008.00299.x)
- 901 Hendry, A. P., & Day, T. (2005). Population structure attributable to reproductive time: isolation by time  
902 and adaptation by time. *Molecular Ecology*, 14(4), 901–916. [https://doi.org/10.1111/j.1365-](https://doi.org/10.1111/j.1365-294X.2005.02480.x)  
903 [294X.2005.02480.x](https://doi.org/10.1111/j.1365-294X.2005.02480.x)
- 904 Hivert, V. (2018). Measuring genetic differentiation from Pool-seq data.
- 905 Hoban, S., Kelley, J. L., Lotterhos, K. E., Antolin, M. F., Bradburd, G., Lowry, D. B., ... Whitlock, M. C.  
906 (2016). Finding the Genomic Basis of Local Adaptation: Pitfalls, Practical Solutions, and Future  
907 Directions. *The American Naturalist*, 188(4), 379–397. <https://doi.org/10.1086/688018>
- 908 Iles, T. D., & Sinclair, M. (1982). Atlantic Herring: Stock Discreteness and Abundance. *Science*,  
909 215(4533), 627–633. <https://doi.org/10.1126/science.215.4533.627>
- 910 Jeffery, N. W., Bradbury, I. R., Stanley, R. R. E., Wringe, B. F., Van Wyngaarden, M., Lowen, J. Ben, ...  
911 DiBacco, C. (2018). Genomewide evidence of environmentally mediated secondary contact of  
912 European green crab ( *Carcinus maenas* ) lineages in eastern North America. *Evolutionary*  
913 *Applications*, 11(6), 869–882. <https://doi.org/10.1111/eva.12601>
- 914 Jones, F. C., Grabherr, M. G., Chan, Y. F., Russell, P., Mauceli, E., Johnson, J., ... Kingsley, D. M.  
915 (2012). The genomic basis of adaptive evolution in threespine sticklebacks. *Nature*, 484(7392), 55–  
916 61. <https://doi.org/10.1038/nature10944>
- 917 Jorgensen, H. B. H., Hansen, M. M., Bekkevold, D., Ruzzante, D. E., & Loeschcke, V. (2005). Marine  
918 landscapes and population genetic structure of herring (*Clupea harengus* L.) in the Baltic Sea.  
919 *Molecular Ecology*, 14(10), 3219–3234. <https://doi.org/10.1111/j.1365-294X.2005.02658.x>
- 920 Kerr, Q., Fuentes-Pardo, A. P., Kho, J., McDermid, J. L., & Ruzzante, D. E. (2018). Temporal stability  
921 and assignment power of adaptively divergent genomic regions between herring ( *Clupea harengus* )  
922 seasonal spawning aggregations. *Ecology and Evolution*, (October), ece3.4768.  
923 <https://doi.org/10.1002/ece3.4768>
- 924 Kolaczkowski, B., Kern, A. D., Holloway, A. K., & Begun, D. J. (2011). Genomic Differentiation  
925 Between Temperate and Tropical Australian Populations of *Drosophila melanogaster*. *Genetics*,  
926 187(1), 245–260. <https://doi.org/10.1534/genetics.110.123059>
- 927 Lamichhaney, S., Barrio, A. M., Rafati, N., Sundstrom, G., Rubin, C.-J., Gilbert, E. R., ... Andersson, L.  
928 (2012). Population-scale sequencing reveals genetic differentiation due to local adaptation in  
929 Atlantic herring. *Proceedings of the National Academy of Sciences*, 109(47), 19345–19350.  
930 <https://doi.org/10.1073/pnas.1216128109>
- 931 Lamichhaney, S., Fuentes-Pardo, A. P., Rafati, N., Ryman, N., McCracken, G. R., Bourne, C., ...  
932 Andersson, L. (2017). Parallel adaptive evolution of geographically distant herring populations on  
933 both sides of the North Atlantic Ocean. *Proceedings of the National Academy of Sciences*, 114(17),  
934 E3452–E3461. <https://doi.org/10.1073/pnas.1617728114>
- 935 Lehnert, S. J., DiBacco, C., Van Wyngaarden, M., Jeffery, N. W., Ben Lowen, J., Sylvester, E. V. A., ...  
936 Bradbury, I. R. (2018). Fine-scale temperature-associated genetic structure between inshore and  
937 offshore populations of sea scallop (*Placopecten magellanicus*). *Heredity*, 1–12.  
938 <https://doi.org/10.1038/s41437-018-0087-9>
- 939 Lewontin, R. C. (2002). Directions in Evolutionary Biology. *Annual Review of Genetics*, 36(1), 1–18.  
940 <https://doi.org/10.1146/annurev.genet.36.052902.102704>

- 941 Li, H. (2013). Aligning sequence reads, clone sequences and assembly contigs with BWA-MEM. *ArXiv*  
942 *Preprint ArXiv*, 00(00), 3. <https://doi.org/arXiv:1303.3997> [q-bio.GN]
- 943 Liaw, A., & Wiener, M. (2002). Classification and Regression by randomForest. *R News*, 2(3), 18–22.
- 944 Limborg, M. T., Helyar, S., De Bruyn, M., Taylor, M. I., Nielsen, E. E., Ogden, R., ... Bekkevold, D.  
945 (2012). Environmental selection on transcriptome-derived SNPs in a high gene flow marine fish, the  
946 Atlantic herring ( *Clupea harengus* ). *Molecular Ecology*, 21(15), 3686–3703.  
947 <https://doi.org/10.1111/j.1365-294X.2012.05639.x>
- 948 Lischer, H. E. L., & Excoffier, L. (2012). PGDSpider: an automated data conversion tool for connecting  
949 population genetics and genomics programs. *Bioinformatics*, 28(2), 298–299.  
950 <https://doi.org/10.1093/bioinformatics/btr642>
- 951 Luu, K., Bazin, E., & Blum, M. G. B. (2017). pcadapt: an R package to perform genome scans for  
952 selection based on principal component analysis. *Molecular Ecology Resources*, 17(1), 67–77.  
953 <https://doi.org/10.1111/1755-0998.12592>
- 954 Madec, G., Delecluse, P., Imbard, M., & Levy, C. (1998). *OPA8.1 Ocean general Circulation Model*  
955 *reference manual*. France.
- 956 Martinez Barrio, A., Lamichhaney, S., Fan, G., Rafati, N., Pettersson, M., Zhang, H., ... Andersson, L.  
957 (2016). The genetic basis for ecological adaptation of the Atlantic herring revealed by genome  
958 sequencing. *ELife*, 5(MAY2016), 1–32. <https://doi.org/10.7554/eLife.12081>
- 959 McDermid, J. L., Swain, D. P., Turcotte, F., Robichaud, S. A., & Surette, T. (2018). Assessment of the  
960 NAFO Division 4T southern Gulf of St. Lawrence Atlantic herring (*Clupea harengus*) in 2016 and  
961 2017. *DFO Can. Sci. Advis. Sec. Res. Doc. 2018/052*, xiv + 122 p.
- 962 McKenna, A., Hanna, M., Banks, E., Sivachenko, A., Cibulskis, K., Kernysky, A., ... DePristo, M. A.  
963 (2010). The Genome Analysis Toolkit: A MapReduce framework for analyzing next-generation  
964 DNA sequencing data. *Genome Research*, 20(9), 1297–1303. <https://doi.org/10.1101/gr.107524.110>
- 965 McPherson, A., O'Reilly, P. T., & Taggart, C. T. (2004). Genetic Differentiation, Temporal Stability, and  
966 the Absence of Isolation by Distance among Atlantic Herring Populations. *Transactions of the*  
967 *American Fisheries Society*, 133(2), 434–446. <https://doi.org/10.1577/02-106>
- 968 McPherson, A., Stephenson, R. L., O'Reilly, P. T., Jones, M. W., & Taggart, C. T. (2001). Genetic  
969 diversity of coastal Northwest Atlantic herring populations: implications for management. *Journal of*  
970 *Fish Biology*, 59(SUPPL. A), 356–370. <https://doi.org/10.1006/jfbi.2001.1769>
- 971 McQuinn, I. H. (1997). Metapopulations and the Atlantic herring. *Reviews in Fish Biology and Fisheries*,  
972 7(3), 297–329. <https://doi.org/10.1023/A:1018491828875>
- 973 Melvin, G. D., Stephenson, R. L., & Power, M. J. (2009). Oscillating reproductive strategies of herring in  
974 the western Atlantic in response to changing environmental conditions. *ICES Journal of Marine*  
975 *Science*, 66(8), 1784–1792. <https://doi.org/10.1093/icesjms/fsp173>
- 976 Messieh, S. N., Anthony, V., & Sinclair, M. (1985). Fecundities of Atlantic herring *Clupea harengus* L.  
977 populations in the Northwest Atlantic. *ICES C.M. 1985/H:8.*, 22 pp.
- 978 Metzger, B. P. H., Duveau, F., Yuan, D. C., Tryban, S., Yang, B., & Wittkopp, P. J. (2016). Contrasting  
979 Frequencies and Effects of cis - and trans -Regulatory Mutations Affecting Gene Expression.  
980 *Molecular Biology and Evolution*, 33(5), 1131–1146. <https://doi.org/10.1093/molbev/msw011>
- 981 Nei, M. (1972). Genetic distance between populations. *The American Naturalist*, 106(949), 283–292.  
982 <https://doi.org/10.1086/285153>
- 983 Nei, M. (2007). The new mutation theory of phenotypic evolution. *Proceedings of the National Academy*  
984 *of Sciences*, 104(30), 12235–12242. <https://doi.org/10.1073/pnas.0703349104>
- 985 Nosil, P., & Feder, J. L. (2012). Genomic divergence during speciation: causes and consequences.  
986 *Philosophical Transactions of the Royal Society B: Biological Sciences*, 367(1587), 332–342.  
987 <https://doi.org/10.1098/rstb.2011.0263>
- 988 Nosil, P., Funk, D. J., & Ortiz-Barrientos, D. (2009). Divergent selection and heterogeneous genomic  
989 divergence. *Molecular Ecology*, 18(3), 375–402. <https://doi.org/10.1111/j.1365-294X.2008.03946.x>

- 990 Overholtz, W. . (2002). The Gulf of Maine–Georges Bank Atlantic herring (*Clupea harengus*): spatial  
991 pattern analysis of the collapse and recovery of a large marine fish complex. *Fisheries Research*,  
992 57(3), 237–254. [https://doi.org/10.1016/S0165-7836\(01\)00359-9](https://doi.org/10.1016/S0165-7836(01)00359-9)
- 993 Pagani, F., & Baralle, F. E. (2004). Genomic variants in exons and introns: identifying the splicing  
994 spoilers. *Nature Reviews Genetics*, 5(May), 389–396.
- 995 Palumbi, S. R. (1994). Genetic Divergence, Reproductive Isolation, and Marine Speciation. *Annual*  
996 *Review of Ecology and Systematics*, 25(1), 547–572.  
997 <https://doi.org/10.1146/annurev.es.25.110194.002555>
- 998 Panagiotou, O. A., & Ioannidis, J. P. A. (2012). What should the genome-wide significance threshold be?  
999 Empirical replication of borderline genetic associations. *International Journal of Epidemiology*,  
1000 41(1), 273–286. <https://doi.org/10.1093/ije/dyr178>
- 1001 Purcell, S., Neale, B., Todd-Brown, K., Thomas, L., Ferreira, M. A. R., Bender, D., ... Sham, P. C.  
1002 (2007). PLINK: A Tool Set for Whole-Genome Association and Population-Based Linkage  
1003 Analyses. *The American Journal of Human Genetics*, 81(3), 559–575.  
1004 <https://doi.org/10.1086/519795>
- 1005 Rambaut, A. (2007). FigTree. Retrieved May 20, 2018, from <http://tree.bio.ed.ac.uk/software/figtree/>
- 1006 Ravinet, M., Faria, R., Butlin, R. K., Galindo, J., Bierne, N., Rafajlović, M., ... Westram, A. M. (2017).  
1007 Interpreting the genomic landscape of speciation: a road map for finding barriers to gene flow.  
1008 *Journal of Evolutionary Biology*, 30(8), 1450–1477. <https://doi.org/10.1111/jeb.13047>
- 1009 Revelle, W. (2018). psych: Procedures for Personality and Psychological Research. Northwestern  
1010 University, Evanston, Illinois, USA. Retrieved from <https://cran.r-project.org/package=psych>
- 1011 Rousset, F. (1997). Genetic differentiation and estimation of gene flow from F-statistics under isolation by  
1012 distance. *Genetics*, 145(April), 1219–1228.
- 1013 Schlotterer, C., Tobler, R., Kofler, R., & Nolte, V. (2014). Sequencing pools of individuals — mining  
1014 genome-wide polymorphism data without big funding. *Nature Reviews Genetics*, 15(11), 749–763.  
1015 <https://doi.org/10.1038/nrg3803>
- 1016 Schluter, D. (2009). Evidence for Ecological Speciation and Its Alternative. *Science*, 323(5915), 737–741.  
1017 <https://doi.org/10.1126/science.1160006>
- 1018 Scott, W. B., & Scott, M. G. (1988). *Atlantic fishes of Canada. Canadian Bulletin of Fisheries and*  
1019 *Aquatic Sciences, bulletin 219*. Toronto, CA: University of Toronto Press.
- 1020 Simmonds, E. J. (2007). Comparison of two periods of North Sea herring stock management: success,  
1021 failure, and monetary value. *ICES Journal of Marine Science*, 64(4), 686–692.  
1022 <https://doi.org/10.1093/icesjms/fsm045>
- 1023 Sinclair, M. (1988). *Marine Populations: an Essay on Population Regulation and Speciation* (p. 252).  
1024 Seattle: Washington Sea Grant/Univ. Wash. Press.
- 1025 Sinclair, M., & Iles, T. D. (1989). Population regulation and speciation in the oceans. *J. Cons. Int. Explor.*  
1026 *Mer*, 45, 165–175.
- 1027 Smith, P. J., & Jamieson, A. (1986). Stock discreteness in herrings: a conceptual revolution. *Fish. Res.*,  
1028 223–234.
- 1029 Stanley, R. R. E., DiBacco, C., Lowen, B., Beiko, R. G., Jeffery, N. W., Van Wyngaarden, M., ...  
1030 Bradbury, I. R. (2018). A climate-associated multispecies cryptic cline in the northwest Atlantic.  
1031 *Science Advances*, 4(3), eaaq0929. <https://doi.org/10.1126/sciadv.aaq0929>
- 1032 Stanley, R. R. E., & Jeffery, N. W. (2017). CartDist: Re-projection tool for complex marine systems.  
1033 <https://doi.org/10.5281/zenodo.802875>
- 1034 Stephenson, R. L., Melvin, G. D., & Power, M. J. (2009). Population integrity and connectivity in  
1035 Northwest Atlantic herring: a review of assumptions and evidence. *ICES Journal of Marine Science*,  
1036 66(8), 1733–1739. <https://doi.org/10.1093/icesjms/fsp189>
- 1037 Sylvester, E. V. A., Beiko, R. G., Bentzen, P., Paterson, I., Horne, J. B., Watson, B., ... Bradbury, I. R.  
1038 (2018). Environmental extremes drive population structure at the northern range limit of Atlantic



- 1039 salmon in North America. *Molecular Ecology*, 27(20), 4026–4040.  
1040 <https://doi.org/10.1111/mec.14849>
- 1041 Tavares, H., Whibley, A., Field, D. L., Bradley, D., Couchman, M., Copsey, L., ... Coen, E. (2018).  
1042 Selection and gene flow shape genomic islands that control floral guides. *Proceedings of the*  
1043 *National Academy of Sciences*, 115(43), 11006–11011. <https://doi.org/10.1073/pnas.1801832115>
- 1044 Teacher, A. G., André, C., Jonsson, P. R., & Merilä, J. (2013). Oceanographic connectivity and  
1045 environmental correlates of genetic structuring in Atlantic herring in the Baltic Sea. *Evolutionary*  
1046 *Applications*, 6(3), 549–567. <https://doi.org/10.1111/eva.12042>
- 1047 Tigano, A., & Friesen, V. L. (2016). Genomics of local adaptation with gene flow. *Molecular Ecology*,  
1048 n/a-n/a. <https://doi.org/10.1111/mec.13606>
- 1049 Townsend, D. W., Thomas, A. C., Mayer, L. M., Thomas, M. A., & Quinlan, J. A. (2004). Oceanography  
1050 of the Northwest Atlantic Shelf (1, W). In A. R. Robinson & K. H. Brink (Eds.), *The Sea: The*  
1051 *Global Coastal Ocean: Interdisciplinary Regional Studies and Syntheses* (pp. 1–57). Harvard  
1052 University Press.
- 1053 Turner, S. D. (2014). qqman: an R package for visualizing GWAS results using Q-Q and manhattan plots.  
1054 *BiorXiv*. <https://doi.org/https://doi.org/10.1101/005165>
- 1055 Turner, T. L., Hahn, M. W., & Nuzhdin, S. V. (2005). Genomic Islands of Speciation in *Anopheles*  
1056 *gambiae*. *PLoS Biology*, 3(9), e285. <https://doi.org/10.1371/journal.pbio.0030285>
- 1057 Van der Auwera, G. A., Carneiro, M. O., Hartl, C., Poplin, R., del Angel, G., Levy-Moonshine, A., ...  
1058 DePristo, M. A. (2013). From FastQ Data to High-Confidence Variant Calls: The Genome Analysis  
1059 Toolkit Best Practices Pipeline. In *Current Protocols in Bioinformatics* (Vol. 11, p. 11.10.1-  
1060 11.10.33). Hoboken, NJ, USA: John Wiley & Sons, Inc.  
1061 <https://doi.org/10.1002/0471250953.bi1110s43>
- 1062 Vitti, J. J., Grossman, S. R., & Sabeti, P. C. (2013). Detecting Natural Selection in Genomic Data. *Annual*  
1063 *Review of Genetics*, 47(1), 97–120. <https://doi.org/10.1146/annurev-genet-111212-133526>
- 1064 Wang, Z., Brickman, D., Greenan, B. J. W., & Yashayaev, I. (2016). An abrupt shift in the Labrador  
1065 Current System in relation to winter NAO events. *Journal of Geophysical Research: Oceans*, 121(7),  
1066 5338–5349. <https://doi.org/10.1002/2016JC011721>
- 1067 Weir, B. S., & Cockerham, C. C. (1984). Estimating F-Statistics for the Analysis of Population Structure.  
1068 *Evolution*, 38(6), 1358. <https://doi.org/10.2307/2408641>
- 1069 Wheeler, J. P., & Winters, G. . (1984). Homing of Atlantic herring (*Clupea harengus harengus*) in  
1070 Newfoundland waters as indicated by tagging data. *Can. J. Fish. Aquat. Sci.*, 41, 108–117.
- 1071 Wu, C.-I. (2001). The genic view of the process of speciation. *Journal of Evolutionary Biology*, 14(6),  
1072 851–865. <https://doi.org/10.1046/j.1420-9101.2001.00335.x>
- 1073 Yeaman, S., & Whitlock, M. C. (2011). The genetic architecture of adaptation under migration-selection  
1074 balance. *Evolution*, 65(7), 1897–1911. <https://doi.org/10.1111/j.1558-5646.2011.01269.x>
- 1075 Zuur, A. F., Ieno, E. N., & Elphick, C. S. (2010). A protocol for data exploration to avoid common  
1076 statistical problems. *Methods in Ecology and Evolution*, 1(1), 3–14. <https://doi.org/10.1111/j.2041-210X.2009.00001.x>  
1077  
1078  
1079

1080 **Figures:**  
1081

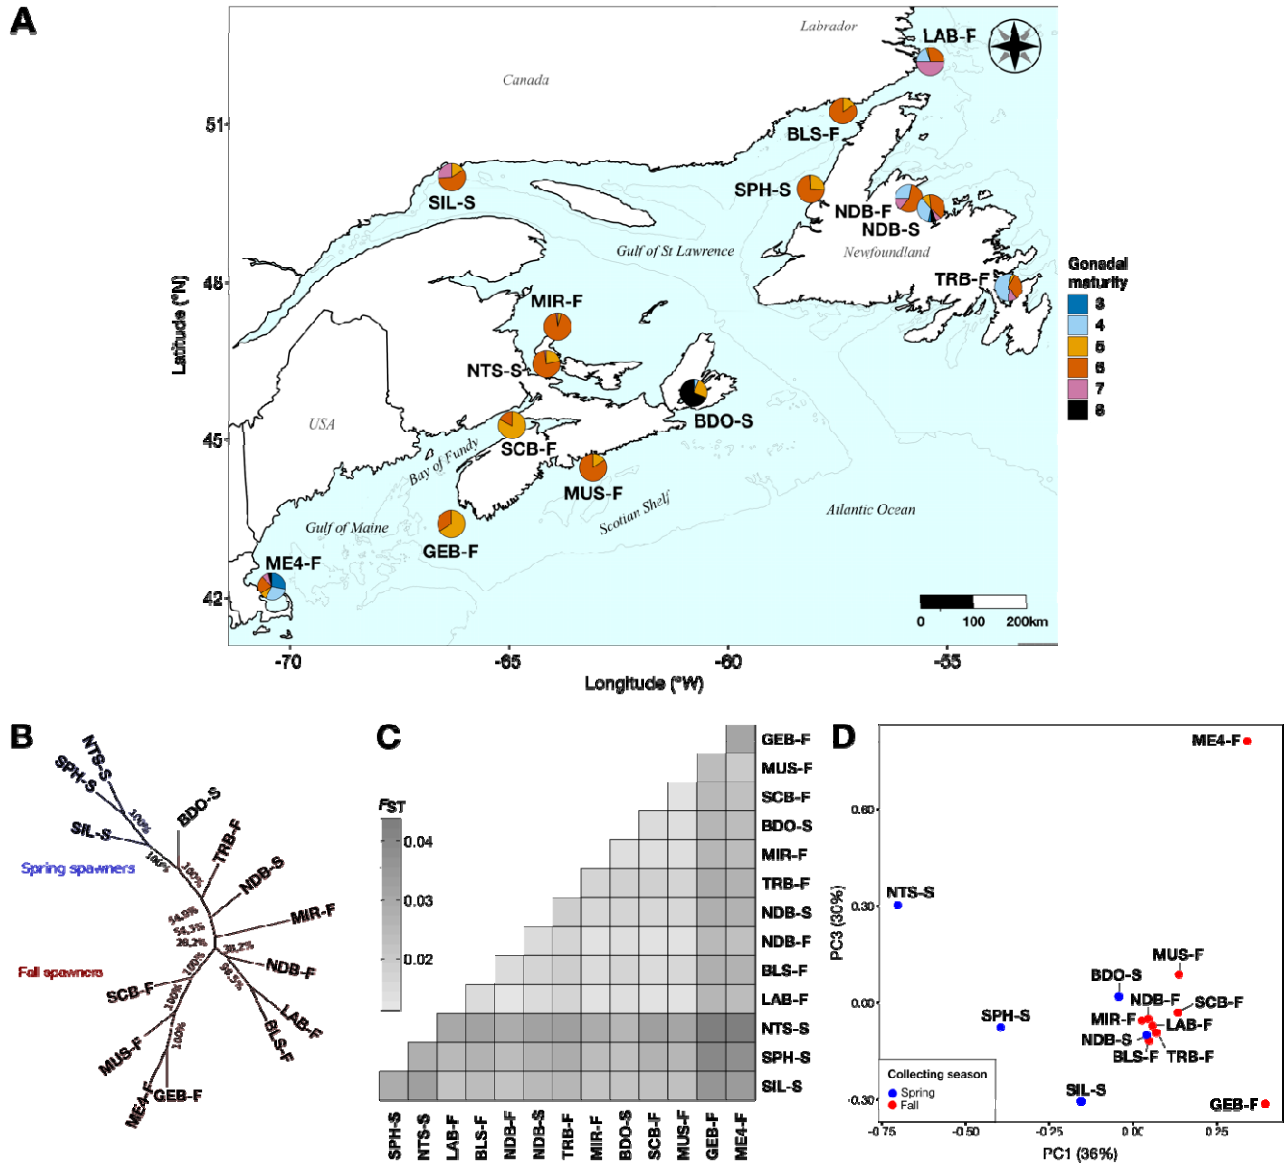

1082  
1083  
1084 **Figure 1. Geographic location and population structure among 14 spawning aggregations in the NW**  
1085 **Atlantic. (A)** Map depicting sampling locations in the Northwest Atlantic. Location names as described in  
1086 Table 1. Pie charts indicate the proportion of individuals in a given gonadal maturity stage for each  
1087 spawning aggregation. Dark and light blue: maturing individuals (stages 3 and 4, respectively), light and  
1088 dark orange: ready-to-spawn and actively spawning individuals (stages 5 and 6, respectively), pink: spent  
1089 individuals (recently spawned) (stage 7), and black: individuals with resting gonads (stage 8) (Bucholtz et  
1090 al., 2008). **(B)** NJ phylogenetic tree based on Nei's distance calculated from population allele frequencies  
1091 of 2,189,380 SNPs (percent bootstrap support is shown for all branches, based on 1000 bootstrapping).  
1092 The collections clustered according to reproductive season into two main groups, spring (blue oval) and  
1093 fall (red oval) spawners with a few exceptions. BDO-S was in an intermediate position between these two  
1094 groups. The spring-collected sample NDB-S was closer to fall spawners. Within the fall spawners,

1095 collections clustered depending on the latitude, forming the southern and northern sub-groups. **(C)**  
1096 Heatmap depicting pairwise  $F_{ST}$  estimates based on population allele frequencies of 2,189,380 SNPs  
1097 (values presented in Table S2). Samples are ordered by collecting season with “S” indicating spring and  
1098 “F” fall. Within season of collection, samples are ordered by latitude. Shading represents the degree of  
1099 genomic divergence. Pairwise  $F_{ST}$  ranged between 0.012 and 0.043, indicating overall and varying low  
1100 levels of population genetic structure. The most significant genomic differentiation was observed between  
1101 spring and fall spawning aggregations. Within spring spawners, the location SIL-S appeared as the most  
1102 differentiated, and within fall spawners, the greatest genetic divergence was observed between the two  
1103 southernmost collections (GEB-F and ME4-F) and all others. Notably, two spring-collected samples  
1104 (BDO-S and NDB-S) showed similar patterns of differentiation with respect to spring spawners as other  
1105 fall spawners. Collection name abbreviations are as defined in Table 1. **(D)** Plot of principal components 1  
1106 and 3 explaining 36% and 30%, respectively, of the genetic variation among 14 herring spawning  
1107 aggregations in the NW Atlantic (based on 2,189,380 SNPs). Each dot represents a spawning aggregation.  
1108 Colors indicate spawning season, blue for spring, red for fall, and yellow for mix. Aggregations were  
1109 distinguishable by spawning season along PC1 and by geographic origin along PC3.  
1110

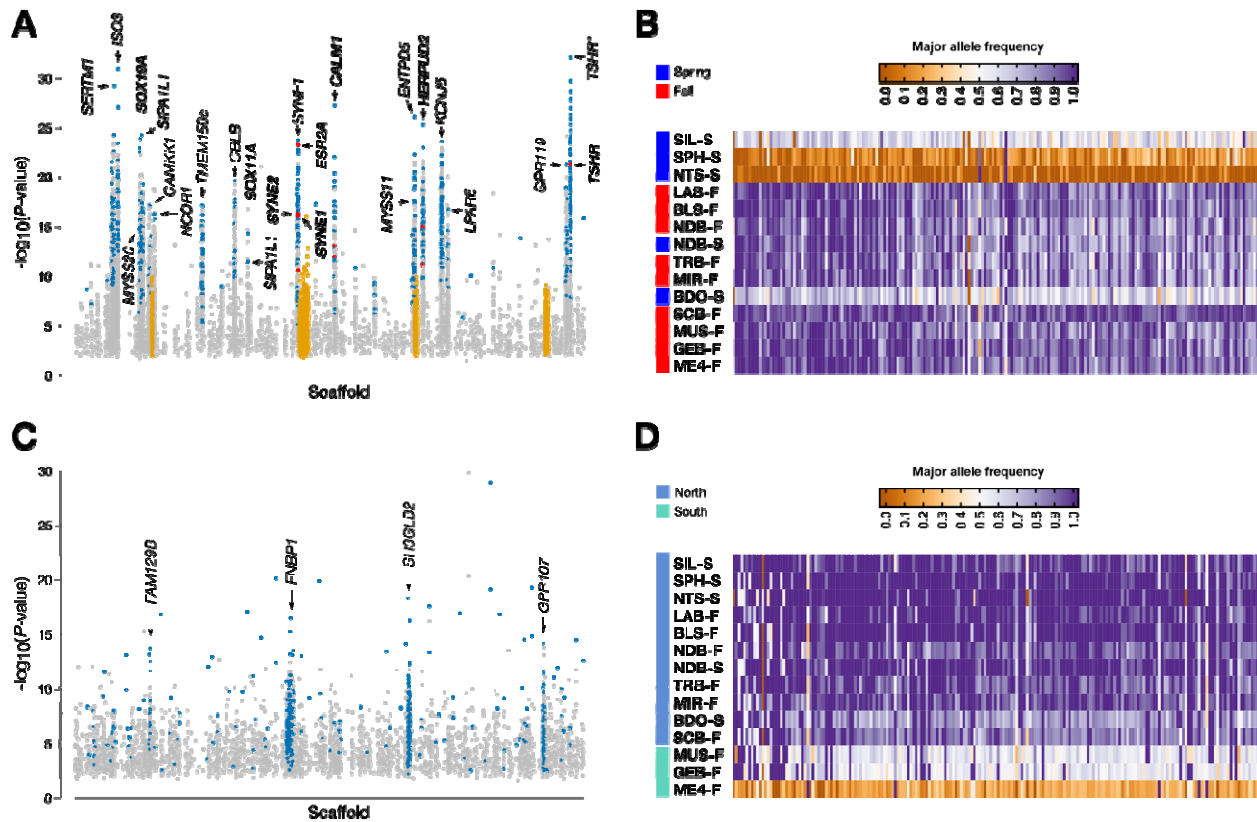

1111  
 1112  
 1113 **Figure 2. Genome-wide patterns of differentiation associated with seasonal reproduction and**  
 1114 **latitude for 14 Atlantic herring spawning aggregations in the Northwest Atlantic. (A-C)** Manhattan  
 1115 plots depicting the genomic position of outlier SNPs and their respective significance association value ( $-\log_{10}P$ -value)  
 1116 obtained with *pcadapt*, (A) for PC1 and (C) for PC3. Each dot of the Manhattan plots  
 1117 represents a single SNP locus. For the purpose of visualization, only outlier loci per PC are displayed  
 1118 (14,726 for PC1 and 6,570 for PC3). The top-ranked 500 SNPs based on importance values from a RF  
 1119 classifier are highlighted in blue. SNPs reported in (Lamichhaney et al., 2017) as highly associated with  
 1120 seasonal reproduction are emphasized in red in (A). SNPs within the four scaffolds showing the latitudinal  
 1121 pattern in PC3 but present in PC1 were denoted in yellow (A). When available, annotation of the closest  
 1122 gene 5Kb upstream or downstream of both, the top SNP per scaffold and the SNPs reported in our  
 1123 previous study, are shown. The SNP annotated as *TSHR*\* falls within the first exon of the *TSHR* gene  
 1124 (unpublished Leif Andersson com. pers.). (B and D) Heatmaps depicting standardized population allele  
 1125 frequencies of the top 200 outlier loci distinguishing collections by (B) seasonal reproduction (PC1), and  
 1126 (D) latitude (PC3). Each row in the heatmaps corresponds to a collection site and each column to a SNP.  
 1127 SNPs were ranked in descending order based on their significance association value,  $-\log_{10}P$ -value (from  
 1128 left to right). Cell colors represent the population allele frequency of the major allele; thus, purple  
 1129 indicates fixation of the major allele (allele frequency of 1) whereas orange represents fixation of the  
 1130 minor allele (major allele frequency of 0).  
 1131

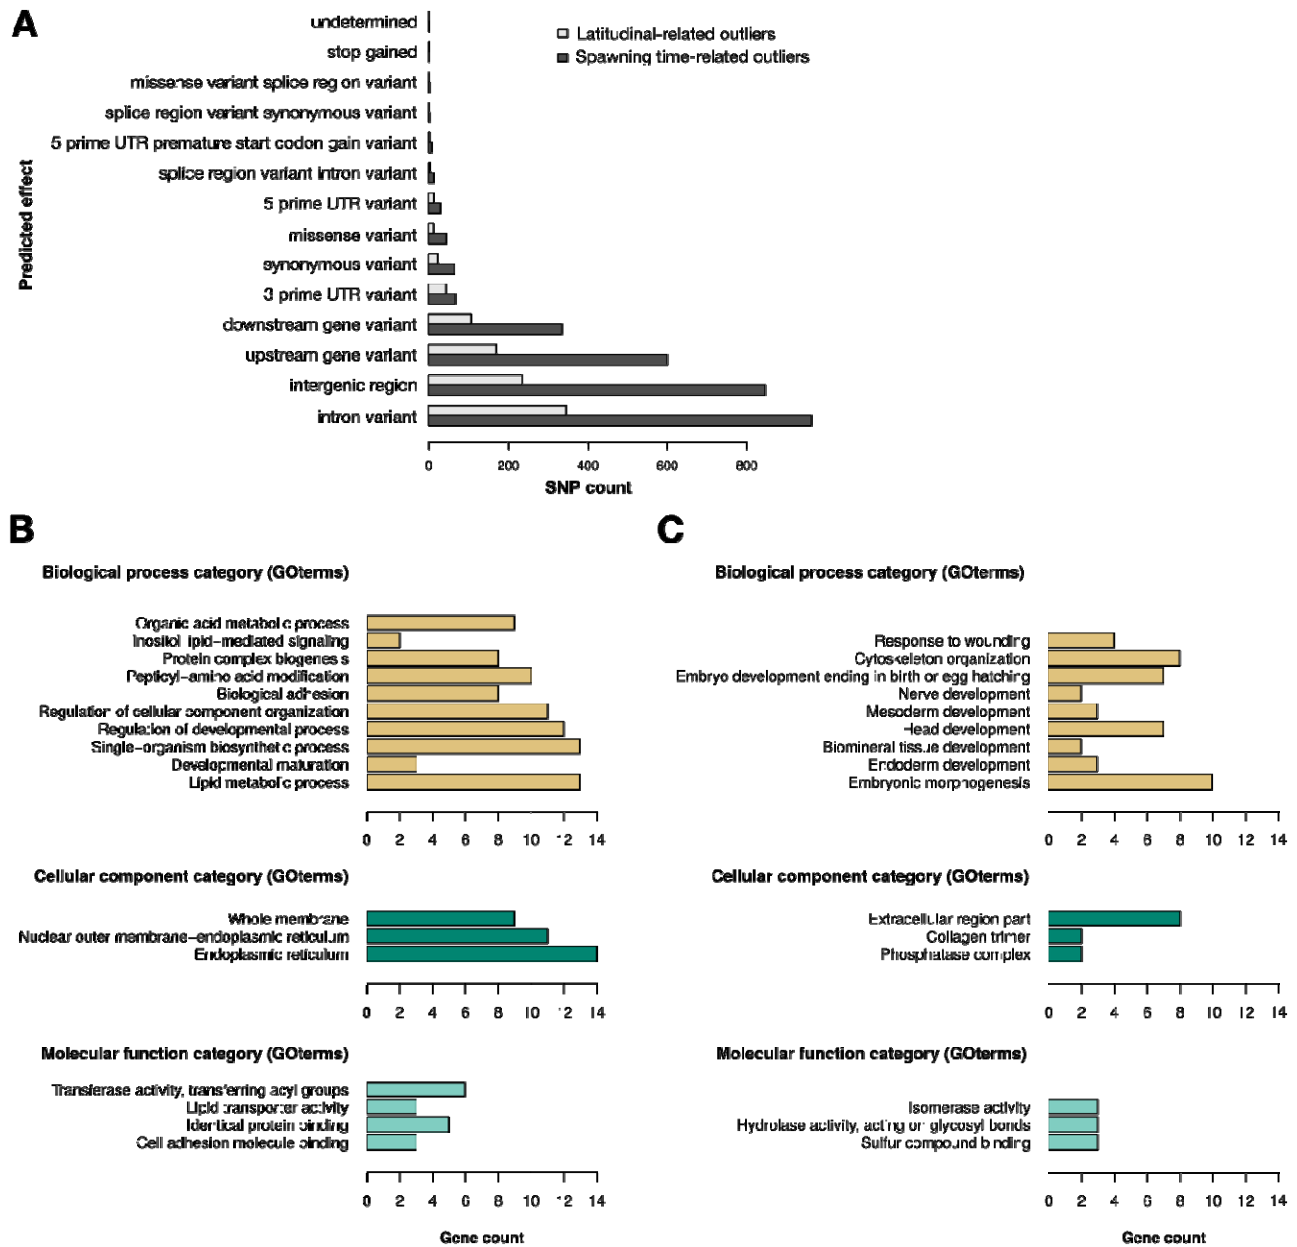

1132  
1133  
1134  
1135  
1136  
1137  
1138  
1139  
1140  
1141

**Figure 3. Functional characterization of outlier SNPs.** (A) Functional classification of outlier SNPs associated with seasonal reproduction (dark gray) and with latitude (light gray), counts. (B-C) Bar plots showing the relative proportion of genes in each of the top GO terms associated with (B) seasonal reproduction and (C) latitude, for each biological category (i.e. biological process, cellular component, and molecular function). Top GO terms corresponded to the ones with  $P$ -value  $< 0.05$  (ranked in ascending order based on their  $P$ -values obtained from ORA, Table S3 and S4, GO terms with an asterisk). Gene counts are indicated within parenthesis.

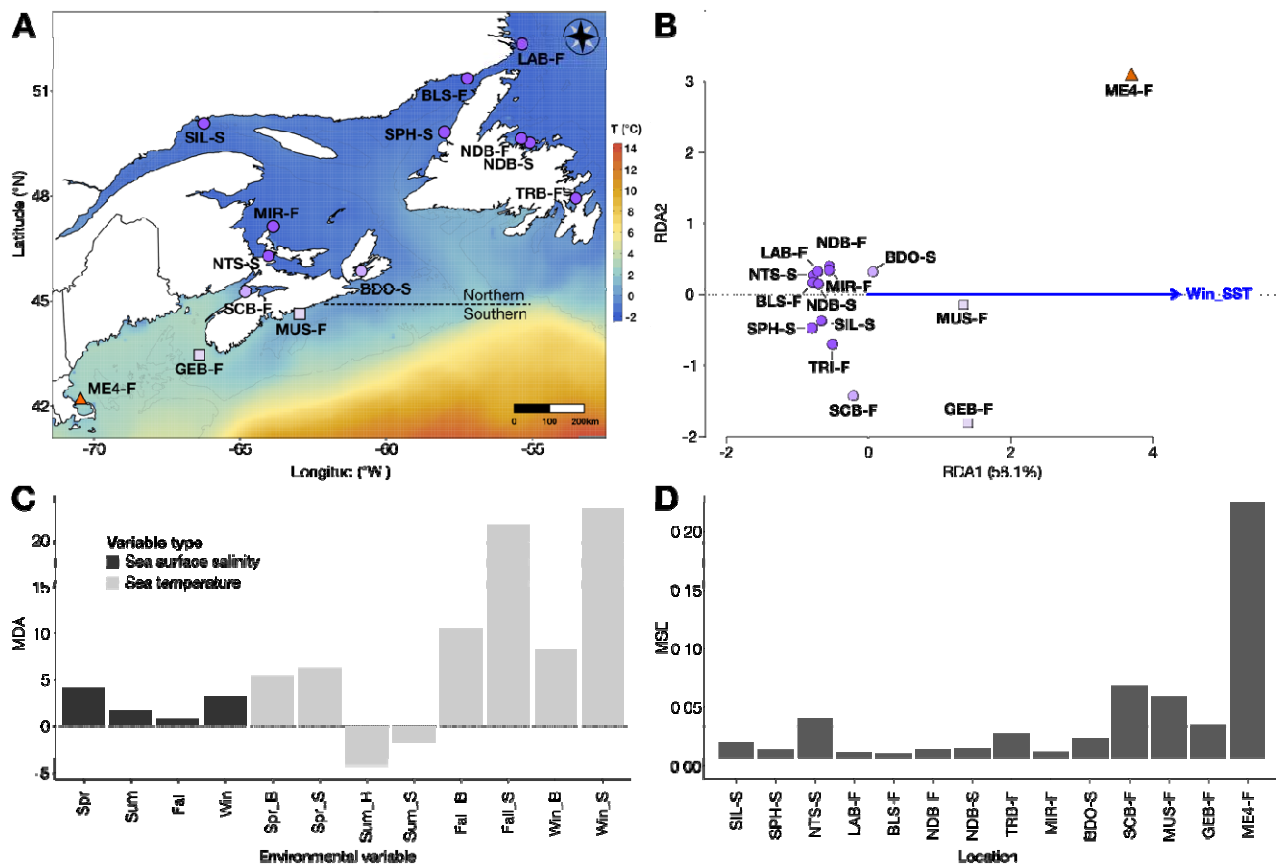

1142  
1143  
1144  
1145  
1146  
1147  
1148  
1149  
1150  
1151  
1152  
1153  
1154  
1155  
1156  
1157  
1158  
1159  
1160  
1161  
1162

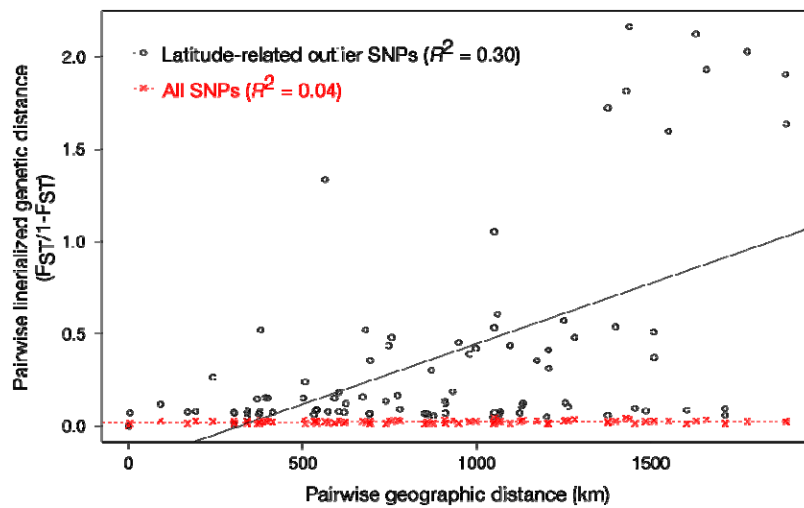

1163  
1164  
1165  
1166  
1167  
1168  
1169  
1170  
1171  
1172  
1173  
1174  
1175

**Figure 5. Isolation-by-distance (IBD) test for 14 NW Atlantic herring populations based on all neutral and outlier SNPs or on latitude-related SNPs only.** Regression between linearized genetic distance ( $F_{ST}/1-F_{ST}$ ), calculated from either 2,189,371 SNPs (red “X”s) or from 6,595 latitude-related outlier SNPs (open black circles), and geographic distance (in km) between pairs of populations. The dashed red line and the continuous black line correspond to the best fit line in each case.  $R^2$  values indicate the correlation between geographic and genetic distance matrices used in the Mantel test (Mantel’s test for all SNPs:  $P < 0.001$ ,  $R^2 = 0.04$ , 9999 replicates; for latitude-related SNPs only:  $P < 0.001$ ,  $R^2 = 0.30$ , 9999 replicates). Note the IBD pattern is only observed in the latitude-related outlier SNPs, not in all SNPs.

1176 **Tables:**

1177

1178 **Table 1.** Characteristics of the 14 herring spawning aggregations included in this study.

1179

| Locality               | Code  | Sample size (N) | Geographic coordinates (longitude, latitude) |       | Sampling (dd/mm/yy)    | Season | Salinity (PPM) | Sequencing year |
|------------------------|-------|-----------------|----------------------------------------------|-------|------------------------|--------|----------------|-----------------|
| Seven Islands          | SIL-S | 50              | -66.33                                       | 50.09 | 06/06/2012             | Spring | 35             | 2016            |
| Stephenville           | SPH-S | 48              | -57.94                                       | 49.73 | 30/05/2012             | Spring | 35             | 2016            |
| Northumberland Strait  | NTS-S | 50              | -64.12                                       | 46.30 | 14/05/06               | Spring | 35             | 2015            |
| Labrador               | LAB-F | 50              | -55.50                                       | 52.25 | 24/08/2014, 22/08/2015 | Fall   | 35             | 2016            |
| Blanc Sablon           | BLS-F | 49              | -57.31                                       | 51.38 | 13/08/2014             | Fall   | 35             | 2016            |
| Notre Dame Bay         | NDB-S | 50              | -55.44                                       | 49.55 | 03/05/2015             | Spring | 35             | 2016            |
| Notre Dame Bay         | NDB-F | 50              | -55.47                                       | 49.55 | 26/10/2015             | Fall   | 35             | 2016            |
| Trinity Bay            | TRB-F | 50              | -53.47                                       | 47.84 | 28/09/2014             | Fall   | 35             | 2015            |
| Miramichi              | MIR-F | 50              | -63.96                                       | 47.04 | 25/08/2014             | Fall   | 35             | 2016            |
| Bras D'Or lake         | BDO-S | 50              | -60.85                                       | 45.93 | 20/04/2016             | Spring | 25             | 2016            |
| Scots Bays             | SCB-F | 50              | -64.92                                       | 45.17 | 24/08/2015             | Fall   | 35             | 2016            |
| Musquodoboit           | MUS-F | 50              | -63.10                                       | 44.63 | 28/10/2015             | Fall   | 35             | 2016            |
| German Banks           | GEB-F | 50              | -66.33                                       | 43.45 | 28/08/2014             | Fall   | 35             | 2015            |
| Maine fishing area 514 | ME4-F | 50              | -70.41                                       | 42.09 | 19/10/2015             | Fall   | 35             | 2016            |

1180
